# Supplementary material for: The folding propensity of α/sulfono-γ-AA peptidic foldamers with both left- and right-handedness
Source: PubMed Central journal article supplement (PMC9814141; doi:10.1038/s42004-021-00496-0), 2021-05-10
Supplement: 42004_2021_496_MOESM1_ESM.pdf [file 42004_2021_496_MOESM1_ESM.pdf]

Supplementary Information for

**The Folding Propensity of  $\alpha$ /Sulfono- $\gamma$ -AA Peptidic Foldamers  
with Both Left- and Right-Handedness**

Peng Teng,<sup>1,2,#,\*</sup> Mengmeng Zheng,<sup>1,#</sup> Darrell Cole Cerrato,<sup>1</sup> Yan Shi,<sup>1</sup> Mi Zhou,<sup>1</sup> Songyi Xue,<sup>1</sup>  
Wei Jiang,<sup>1,3</sup> Lukasz Wojtas,<sup>1</sup> Li-June Ming,<sup>1</sup> Yong Hu,<sup>3,\*</sup> and Jianfeng Cai<sup>1,\*</sup>

<sup>1</sup>Department of Chemistry, University of South Florida, 4202 E. Fowler Ave, Tampa, FL 33620,  
USA

<sup>2</sup>Institute of Drug Discovery and Design, College of Pharmaceutical Sciences, Zhejiang University,  
Hangzhou, Zhejiang 310058, P. R. China

<sup>3</sup>College of Engineering and Applied Science, Nanjing University, Nanjing, Jiangsu 210093, P. R.  
China

<sup>#</sup>These authors contributed equally.

**Correspondence** and requests for materials should be addressed to J. C. ([jianfengcai@usf.edu](mailto:jianfengcai@usf.edu)), Y.  
H. ([hvyong@nju.edu.cn](mailto:hvyong@nju.edu.cn)), or P. T. ([pengteng@zju.edu.cn](mailto:pengteng@zju.edu.cn))

## 1. Supplementary Methods

All reagents and solvents were purchased from Fisher or Aldrich and used without further purification. Fmoc protected  $\alpha$ -amino acids and Rink-amide resin (0.6 mmol/g, 200–400 mesh) were purchased from Chem-Impex International, Inc. Solid-phase syntheses of the compounds were carried out in the peptide synthesis vessel on a Burrell Wrist-Action shaker. The products were analyzed and purified on a Waters Breeze 2 HPLC system installed with both analytic module (1 mL/min) and preparative module (16 mL/min), by employing a method using 5–100% linear gradient of solvent B (0.1% TFA in acetonitrile) in solvent A (0.1% TFA in water) over 40 min, followed by 100% solvent B over 10 min. The desired fractions were collected and lyophilized on a Labconco lyophilizer. High-resolution MS was conducted on an Agilent 6540 LC/QTOF system.  $^1\text{H}$ NMR spectra were acquired with the WET solvent suppression at Varian 600 MHz.

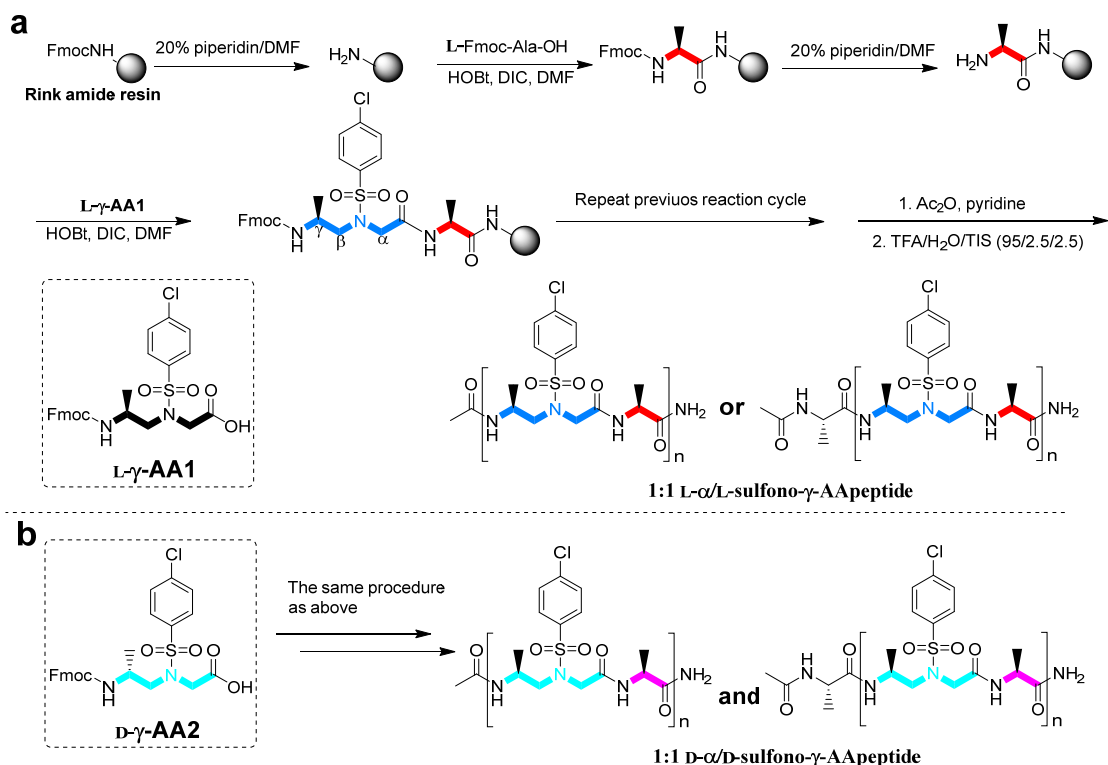

**Supplementary Scheme S1. General synthetic route.** (a) Solid phase to prepare L- $\alpha$ /L-sulfono- $\gamma$ -AA oligomers; (b) Solid phase to prepare D- $\alpha$ /D-sulfono- $\gamma$ -AA oligomers.

The L-sulfono- $\gamma$ -AApeptide building block L- $\gamma$ -AA1 was synthesized as previously reported.<sup>1</sup> The D-sulfono- $\gamma$ -AApeptide building block D- $\gamma$ -AA2 was synthesized using same procedures except that the D-Fmoc-Ala-OH was used at the beginning.<sup>2</sup> Oligomers 1–10 were synthesized on solid support Rink-amide resin, as shown in previously reported standard procedures.<sup>1-3</sup> 100 mg of Rink-amide resin were used for the synthesis of each oligomer.

**General synthetic procedure of solid phase synthesis of oligomers.** The solid phase synthesis was conducted on 100 mg Rink amide resin (0.6 mmol/g) for each oligomer under room temperature at atmosphere pressure. The resin was swelled in DMF for 30 min before use, followed by treatment with 20% piperidine/DMF solution (2 mL) for 10 min ( $\times 2$ ) to remove Fmoc protecting group, then washed three times with DCM and three times with DMF. A premixed solution of Fmoc-Ala-OH (with desired chiral configuration, 3 equiv.), HOBt (6 equiv.), and DIC (6 equiv.) in 2 mL DMF was added to the resin and shaken for 4 h to complete the coupling reaction. After wash with DCM and DMF, the resin was treated with 20% piperidine/DMF solution for 10 min ( $\times 2$ ). Then, the sulfono- $\gamma$ -AApeptide building block  $\gamma$ -AA with the desired chiral configuration was coupled on the resin under the same abovementioned reaction conditions. The reaction cycles were repeated until the desired oligomers were synthesized. The N-terminal of the sequence was capped with acetic anhydride (0.5 mL) in pyridine (2 mL) (30 min $\times 2$ ), followed by treatment with TFA/H<sub>2</sub>O/TIS (4 mL, 95/2.5/2.5, v/v/v) for 2 h. The cleavage solution was collected, and the beads was washed with TFA (1 mL $\times 2$ ) and DCM (3 mL $\times 2$ ), the combined organic phase was evaporated under nitrogen flow to give the crude, which was analyzed and then purified by Water HPLC system, with 1 mL/min and 16 mL/min flow speed respectively. The gradient eluting method of 20% to 100% of solvent B (0.1% TFA in acetonitrile) in A (0.1% TFA in water) over 50 min was performed. All the oligomers were obtained with decent crude purity and good yield (55.88–67.04%) after prep-HPLC purification.

Oligomer 1, HR-MS (ESI), C<sub>58</sub>H<sub>78</sub>Cl<sub>4</sub>N<sub>13</sub>O<sub>17</sub>S<sub>4</sub> [M+H]<sup>+</sup> calcd = 1496.3270; found = 1496.3268.

Oligomer **2**, HR-MS (ESI), C<sub>61</sub>H<sub>83</sub>Cl<sub>4</sub>N<sub>14</sub>O<sub>18</sub>S<sub>4</sub> [M+H]<sup>+</sup> calcd = 1567.3641; found = 1567.3637.

Oligomer **3**, HR-MS (ESI), C<sub>72</sub>H<sub>96</sub>Cl<sub>5</sub>N<sub>16</sub>O<sub>21</sub>S<sub>5</sub> [M+H]<sup>+</sup> calcd = 1855.3977; found = 1855.3951.

Oligomer **4**, HR-MS (ESI), C<sub>75</sub>H<sub>101</sub>Cl<sub>5</sub>N<sub>17</sub>O<sub>22</sub>S<sub>5</sub> [M+H]<sup>+</sup> calcd = 1926.4348; found = 1926.4308.

Oligomer **5**, HR-MS (ESI), C<sub>86</sub>H<sub>114</sub>Cl<sub>6</sub>N<sub>19</sub>O<sub>25</sub>S<sub>6</sub> [M+H]<sup>+</sup> calcd = 2214.4683; found = 2214.4624.

Oligomer **6**, HR-MS (ESI), C<sub>89</sub>H<sub>119</sub>Cl<sub>6</sub>N<sub>20</sub>O<sub>26</sub>S<sub>6</sub> [M+H]<sup>+</sup> calcd = 2285.5054; found = 1145.2409  
[M+2H]<sup>2+</sup>, 1167.2321 [M+2Na]<sup>2+</sup>.

Oligomer **7**, HR-MS (ESI), C<sub>100</sub>H<sub>132</sub>Cl<sub>7</sub>N<sub>22</sub>O<sub>29</sub>S<sub>7</sub> [M+Na]<sup>+</sup> calcd = 2595.5209; found = 2595.5181.

Oligomer **8**, HR-MS (ESI), C<sub>103</sub>H<sub>137</sub>Cl<sub>7</sub>N<sub>23</sub>O<sub>30</sub>S<sub>7</sub> [M+H]<sup>+</sup> calcd = 2644.5761; found = 1322.7897  
[M+2H]<sup>2+</sup>, 1344.7775 [M+2Na]<sup>2+</sup>.

Oligomer **9**, HR-MS (ESI), C<sub>103</sub>H<sub>136</sub>Cl<sub>7</sub>N<sub>23</sub>O<sub>30</sub>S<sub>7</sub> [M+H]<sup>+</sup> calcd = 2643.5688; found = 1322.7923  
[M+2H]<sup>2+</sup>, 1345.7630 [M+2Na]<sup>2+</sup>, 883.5293 [M+3H]<sup>3+</sup>.

Oligomer **10**, HR-MS (ESI), C<sub>117</sub>H<sub>154</sub>Cl<sub>8</sub>N<sub>26</sub>O<sub>34</sub>S<sub>8</sub> [M+H]<sup>+</sup> calcd = 3002.6395; found = 1504.8253  
[M+2H]<sup>2+</sup>, 1525.7979 [M+2Na]<sup>2+</sup>, 1003.8857 [M+3H]<sup>3+</sup>.

**Supplementary Table S1.** HPLC purities and retention time of foldamers **1–10**.

| Compound  | HPLC purification (%) | Retention Time (min) |
|-----------|-----------------------|----------------------|
| <b>1</b>  | 99.99                 | 16.55                |
| <b>2</b>  | 99.80                 | 16.06                |
| <b>3</b>  | 99.32                 | 18.47                |
| <b>4</b>  | 99.90                 | 18.30                |
| <b>5</b>  | 100.0                 | 19.81                |
| <b>6</b>  | 99.25                 | 19.24                |
| <b>7</b>  | 97.30                 | 21.31                |
| <b>8</b>  | 99.10                 | 21.61                |
| <b>9</b>  | 97.94                 | 21.03                |
| <b>10</b> | 98.02                 | 22.59                |

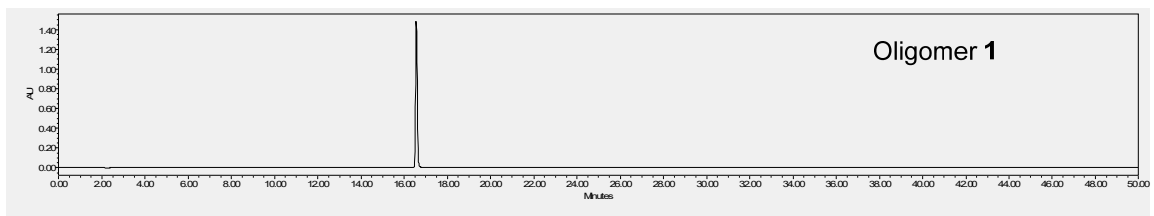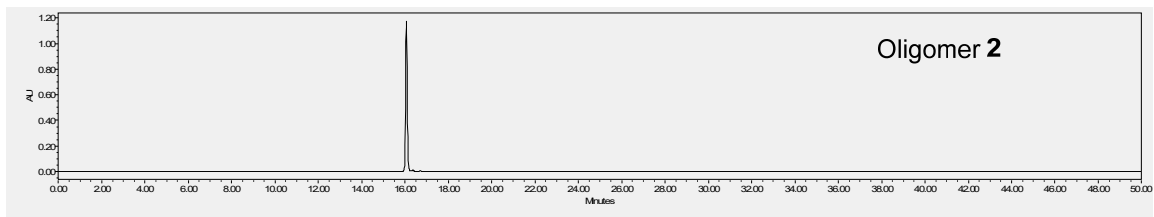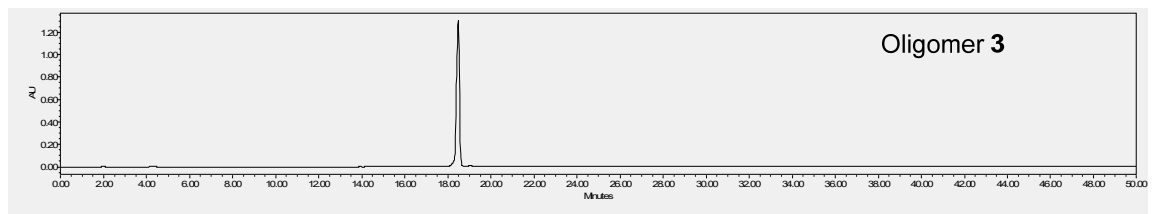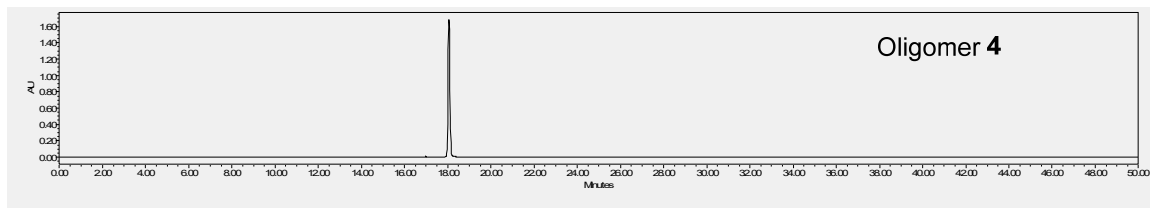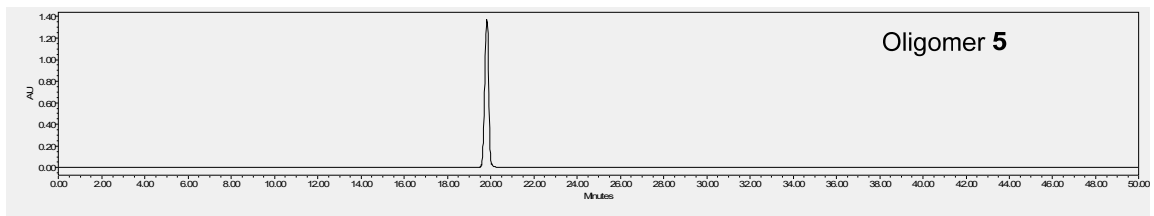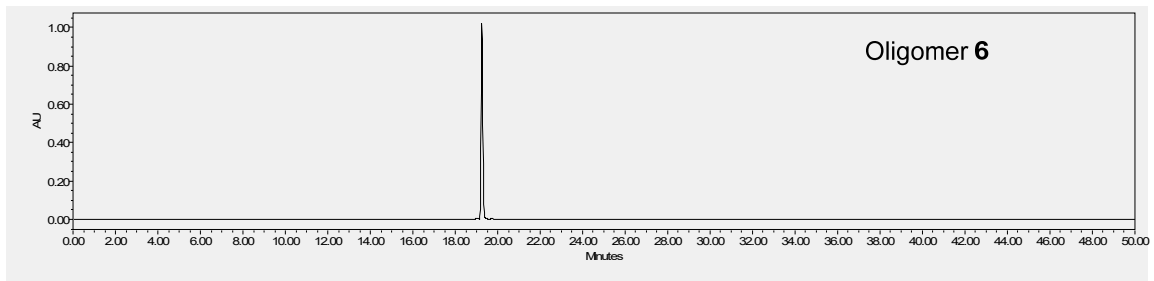

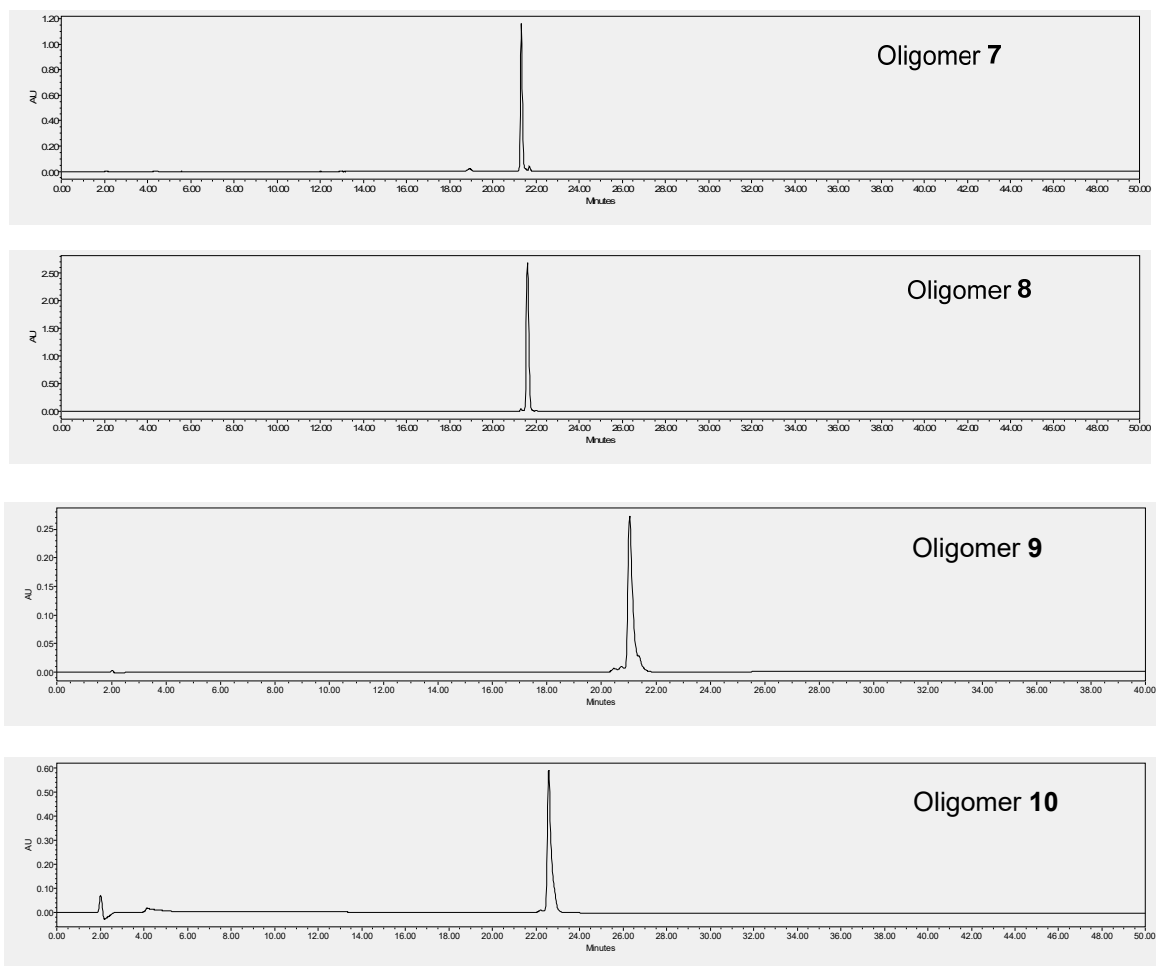

**Supplementary Fig. S1. HPLC spectra of foldamers 1–10.** The gradient eluting method of 20% to 100% of solvent B (0.1% TFA in acetonitrile) in A (0.1% TFA in water) over 50 min was performed.

# Oligomer 1

MS Zoomed Spectrum

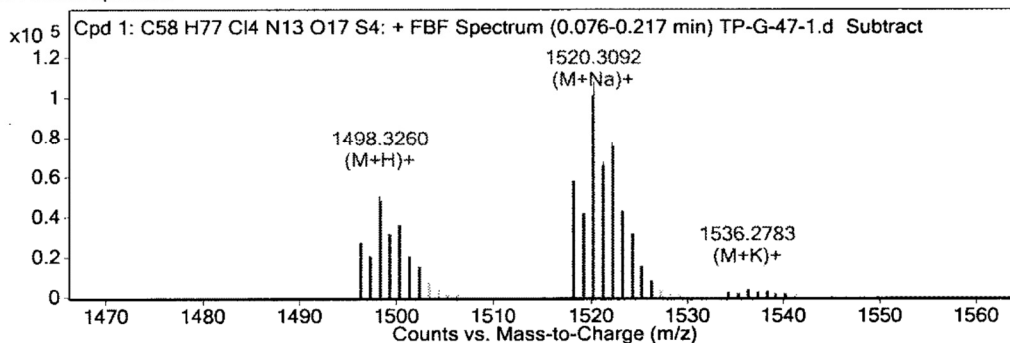

# Oligomer 2

MS Zoomed Spectrum

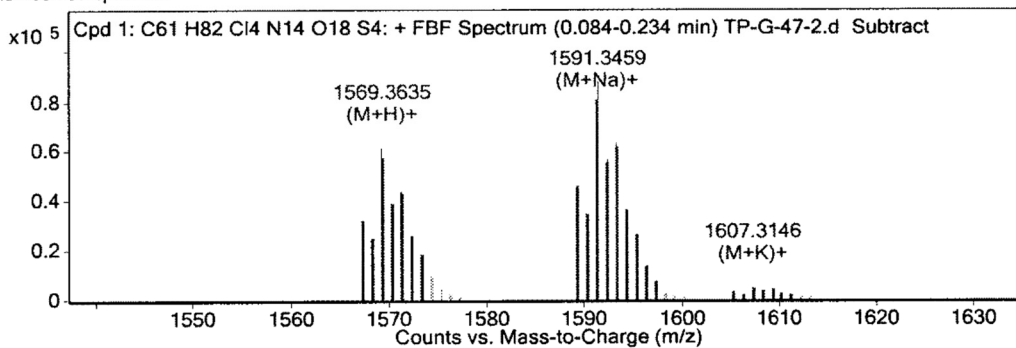

# Oligomer 3

MS Zoomed Spectrum

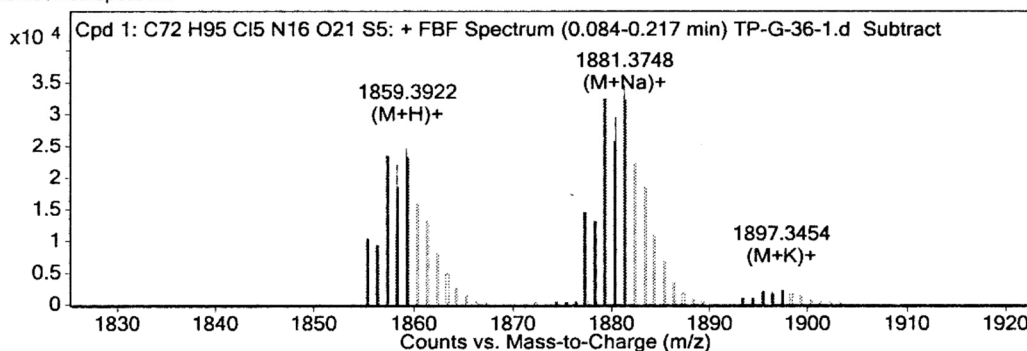

# Oligomer 4

MS Zoomed Spectrum

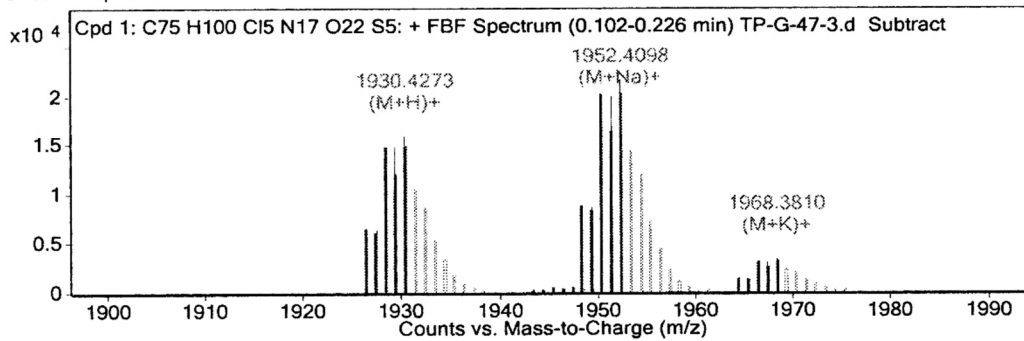

# Oligomer 5

MS Zoomed Spectrum

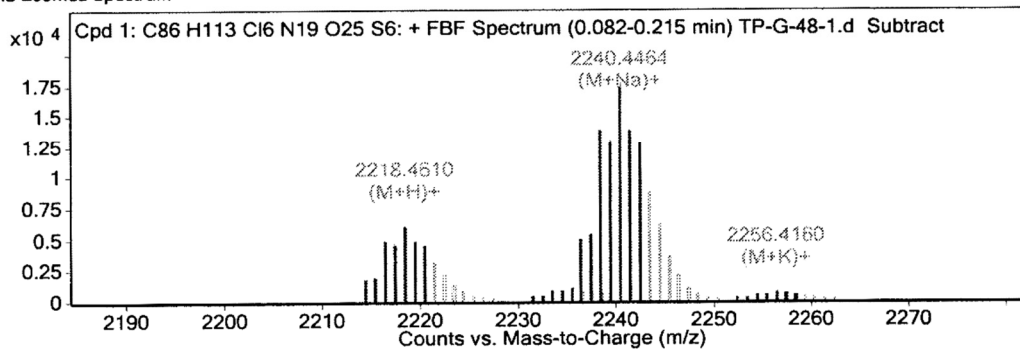

# Oligomer 6

MS Zoomed Spectrum

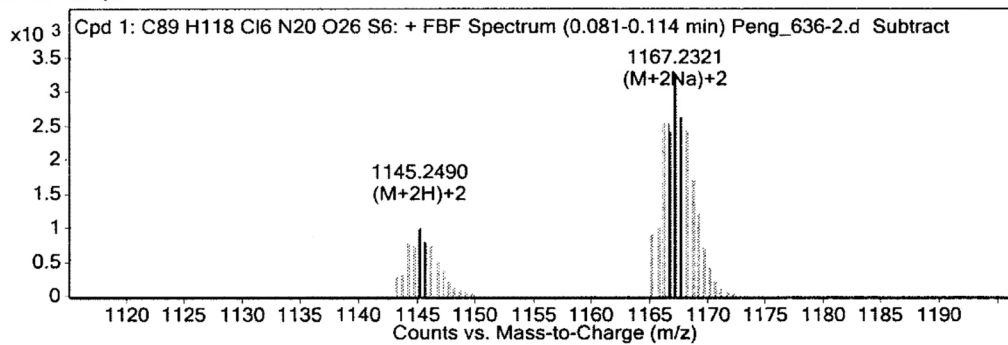



# Oligomer 7

MS Zoomed Spectrum

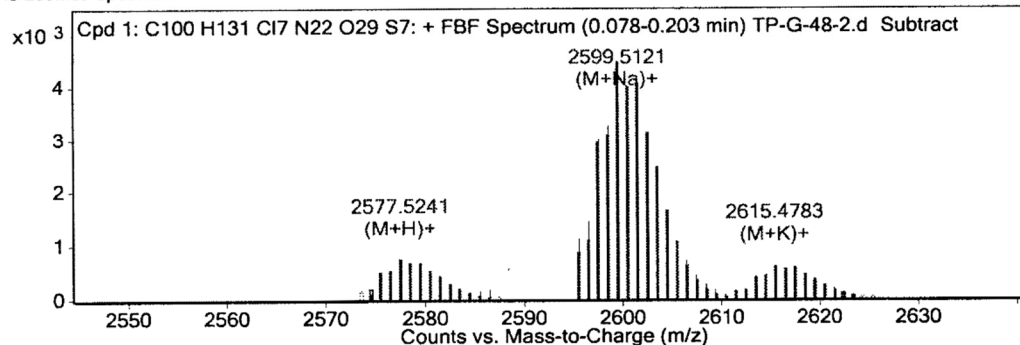

# Oligomer 8

MS Zoomed Spectrum

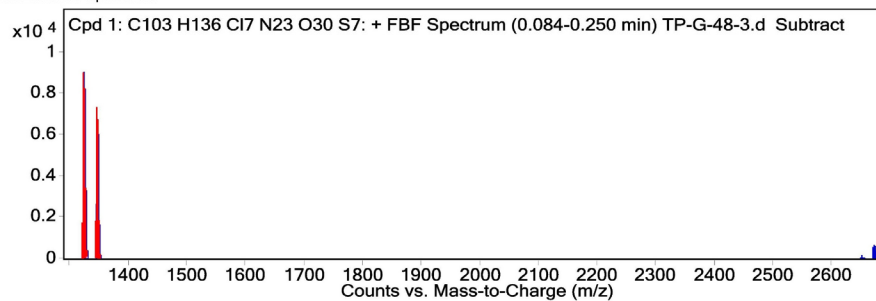

MS Spectrum Peak List

| <i>m/z</i> | <i>z</i> | Abund   | Formula                | Ion       |
|------------|----------|---------|------------------------|-----------|
| 1322.7897  | 2        | 1543.92 | C103H138Cl7N23O30S7    | (M+2H)+2  |
| 1324.79    | 2        | 9016.68 | C103H138Cl7N23O30S7    | (M+2H)+2  |
| 1325.29    | 2        | 8137.86 | C103H138Cl7N23O30S7    | (M+2H)+2  |
| 1325.7888  | 2        | 8179.87 | C103H138Cl7N23O30S7    | (M+2H)+2  |
| 1326.289   | 2        | 6567.15 | C103H138Cl7N23O30S7    | (M+2H)+2  |
| 1344.7775  | 2        | 2405.54 | C103H136Cl7N23Na2O30S7 | (M+2Na)+2 |
| 1346.7719  | 2        | 6763    | C103H136Cl7N23Na2O30S7 | (M+2Na)+2 |
| 1347.272   | 2        | 6314.27 | C103H136Cl7N23Na2O30S7 | (M+2Na)+2 |
| 2646.5548  | 1        | 102.11  | C103H137Cl7N23O30S7    | (M+H)+    |
| 2666.5766  | 1        | 367.94  | C103H136Cl7N23NaO30S7  | (M+Na)+   |

# Oligomer 9

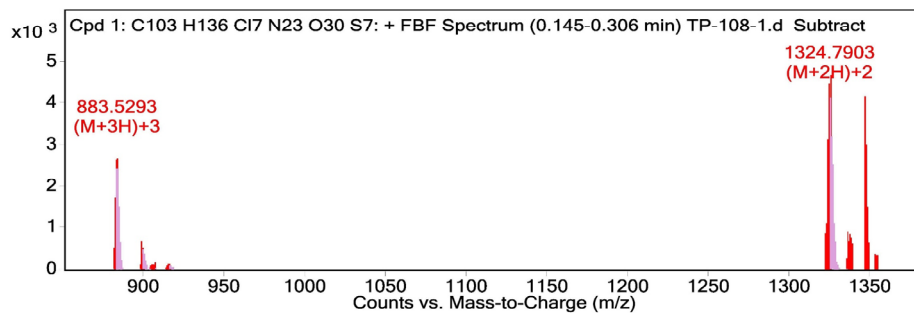

MS Spectrum Peak List

| m/z       | z | Abund   | Formula                | Ion             |
|-----------|---|---------|------------------------|-----------------|
| 882.1952  | 3 | 381.25  | C103H139Cl7N23O30S7    | (M+3H)+3        |
| 898.1774  | 3 | 703.99  | C103H134Cl7N23Na3O29S7 | (M+3Na)+3[-H2O] |
| 904.8322  | 3 | 87.29   | C103H136Cl7N23Na3O30S7 | (M+3Na)+3       |
| 914.1518  | 3 | 81.25   | C103H134Cl7K3N23O29S7  | (M+3K)+3[-H2O]  |
| 1322.7923 | 2 | 608.13  | C103H138Cl7N23O30S7    | (M+2H)+2        |
| 1324.2906 | 2 | 3475.52 | C103H138Cl7N23O30S7    | (M+2H)+2        |
| 1324.7903 | 2 | 4691.55 | C103H138Cl7N23O30S7    | (M+2H)+2        |
| 1335.78   | 2 | 699.87  | C103H134Cl7N23Na2O29S7 | (M+2Na)+2[-H2O] |
| 1345.763  | 2 | 4187.48 | C103H136Cl7N23Na2O30S7 | (M+2Na)+2       |
| 1351.7506 | 2 | 368.51  | C103H134Cl7K2N23O29S7  | (M+2K)+2[-H2O]  |

# Oligomer 10

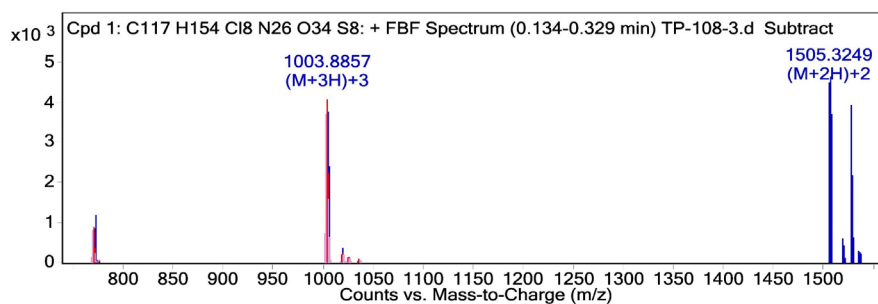

**MS Spectrum Peak List**

| <i>m/z</i> | <i>z</i> | Abund   | Formula                | Ion             |
|------------|----------|---------|------------------------|-----------------|
| 770.6426   | 4        | 113.07  | C117H152Cl8N26Na4O33S8 | (M+4Na)+4[-H2O] |
| 774.8915   | 4        | 29.51   | C117H154Cl8N26Na4O34S8 | (M+4Na)+4       |
| 1003.5526  | 3        | 3613.13 | C117H157Cl8N26O34S8    | (M+3H)+3        |
| 1018.8664  | 3        | 413.37  | C117H152Cl8N26Na3O33S8 | (M+3Na)+3[-H2O] |
| 1025.1937  | 3        | 164.93  | C117H154Cl8N26Na3O34S8 | (M+3Na)+3       |
| 1034.8414  | 3        | 89.58   | C117H152Cl8K3N26O33S8  | (M+3K)+3[-H2O]  |
| 1504.8253  | 2        | 4518.36 | C117H156Cl8N26O34S8    | (M+2H)+2        |
| 1517.8055  | 2        | 633.86  | C117H152Cl8N26Na2O33S8 | (M+2Na)+2[-H2O] |
| 1525.7979  | 2        | 3945.88 | C117H154Cl8N26Na2O34S8 | (M+2Na)+2       |
| 1533.7838  | 2        | 328.35  | C117H152Cl8K2N26O33S8  | (M+2K)+2[-H2O]  |

**Supplementary Fig. S2. HRMS spectra of oligomers 1–10.** High-resolution MS was conducted on an Agilent 6540 LC/QTOF system.

## Crystal packing of compounds 4, 6, 7, and 9

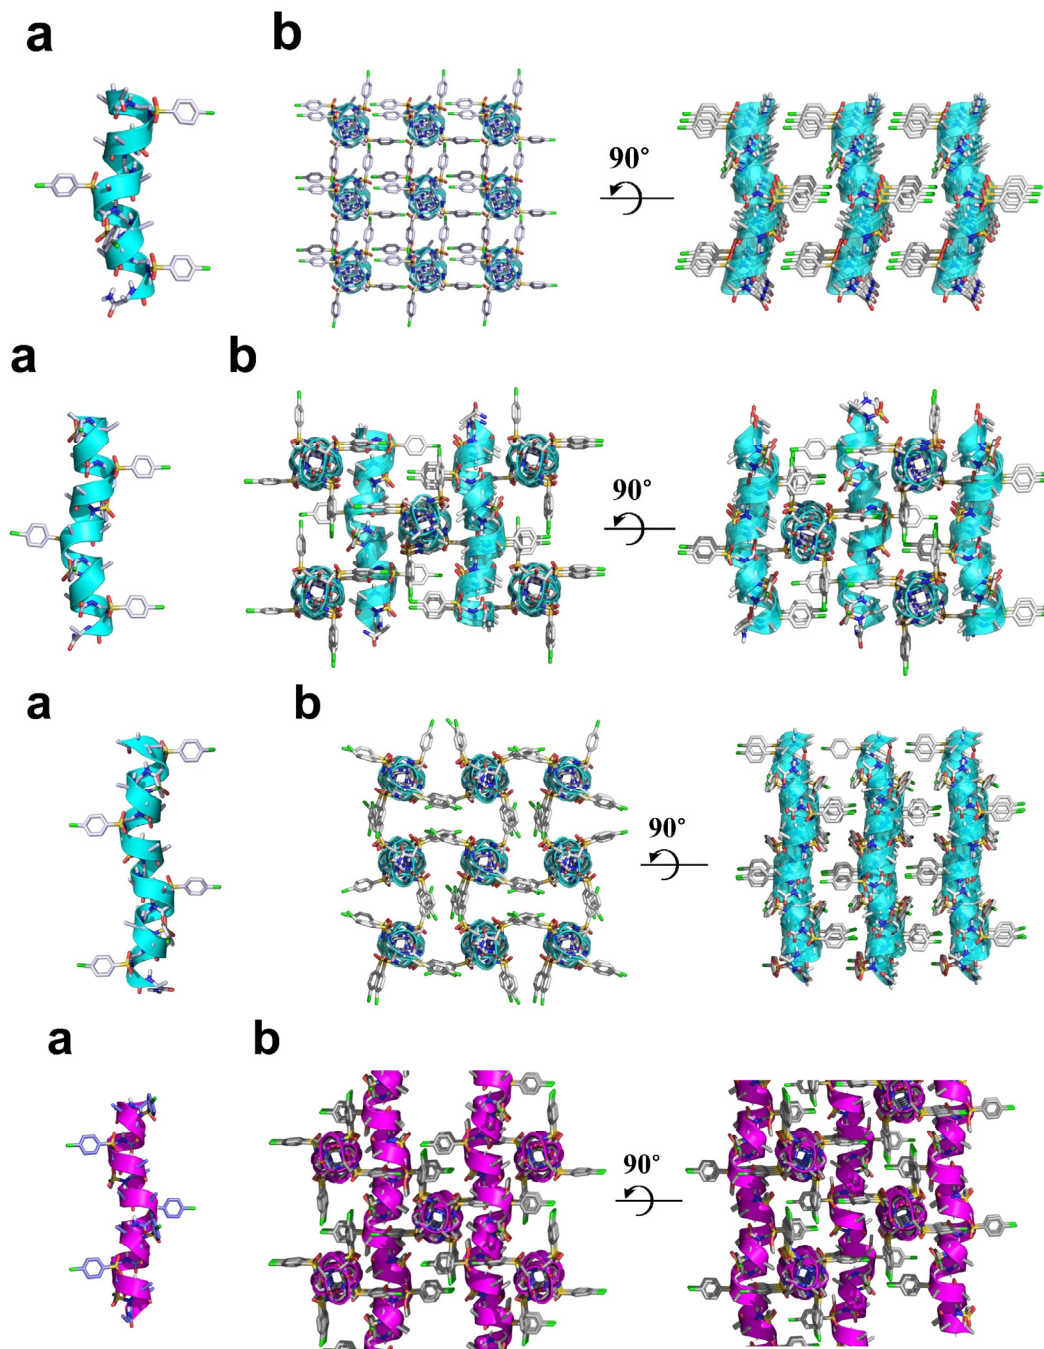

**Supplementary Fig. S3. Crystal packing.** (a) Helical cartoon representation of 4, 6, 7, or 9 (from top to bottom) shown as dumbbell. (b) Crystal packing of 4, 6, 7, or 9. Solvent molecules were also excluded from the crystal lattice.



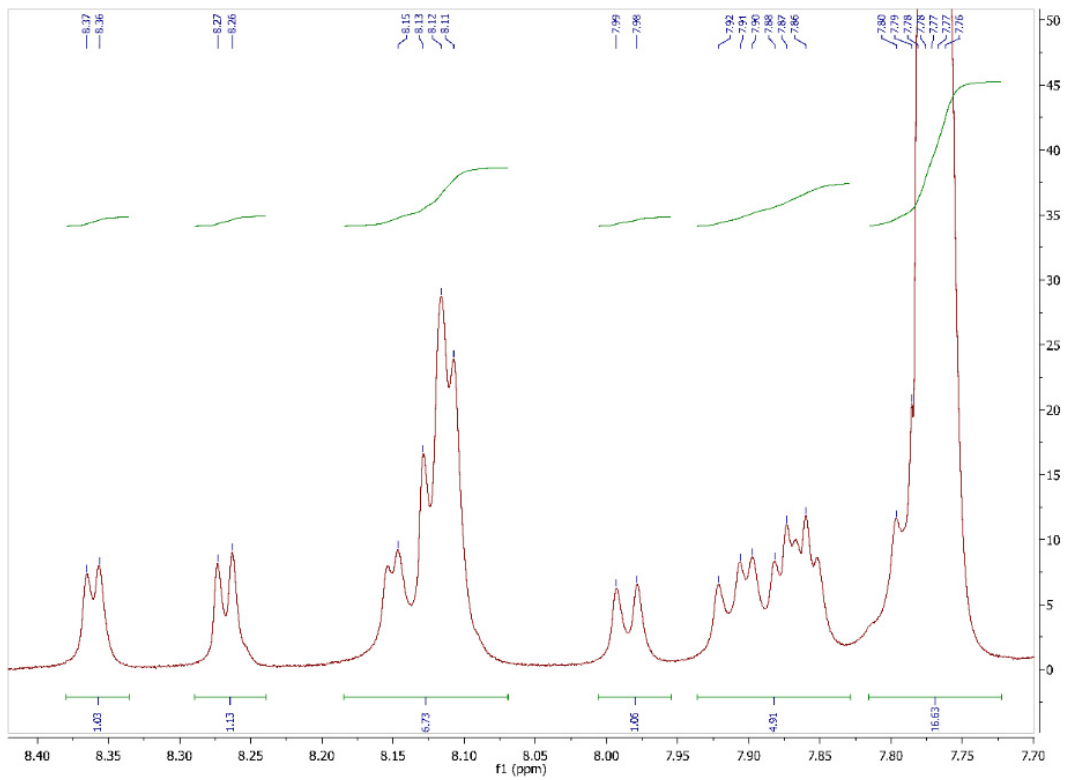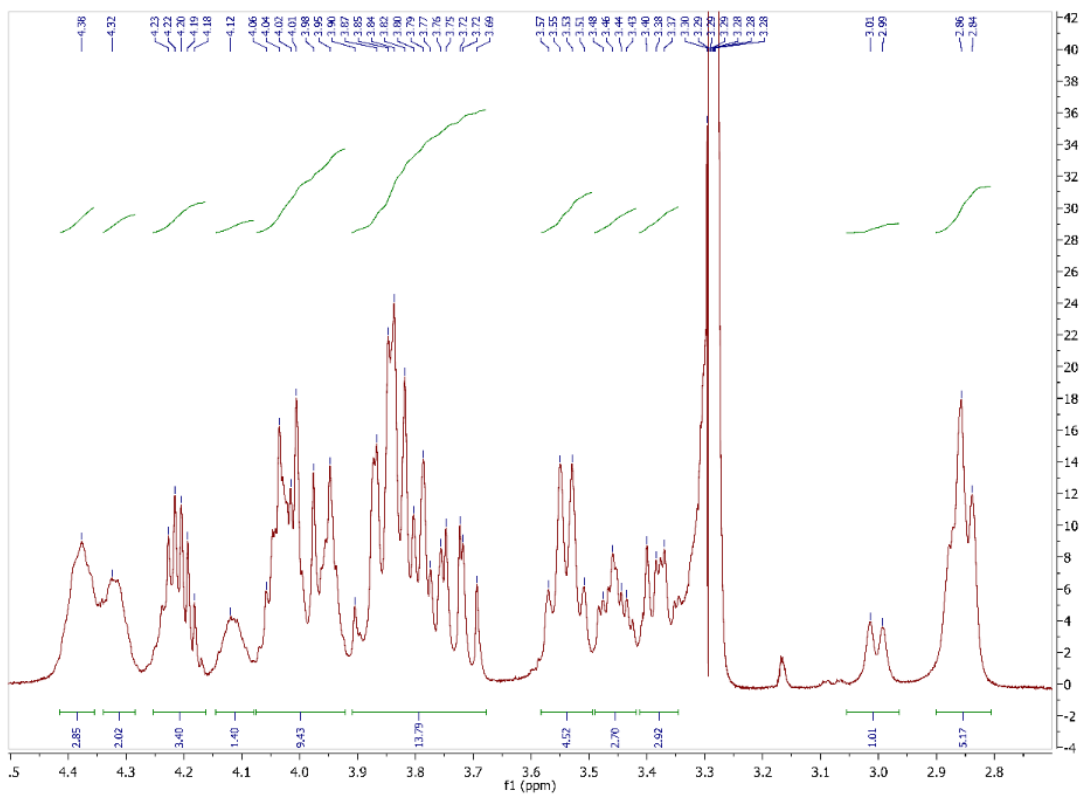

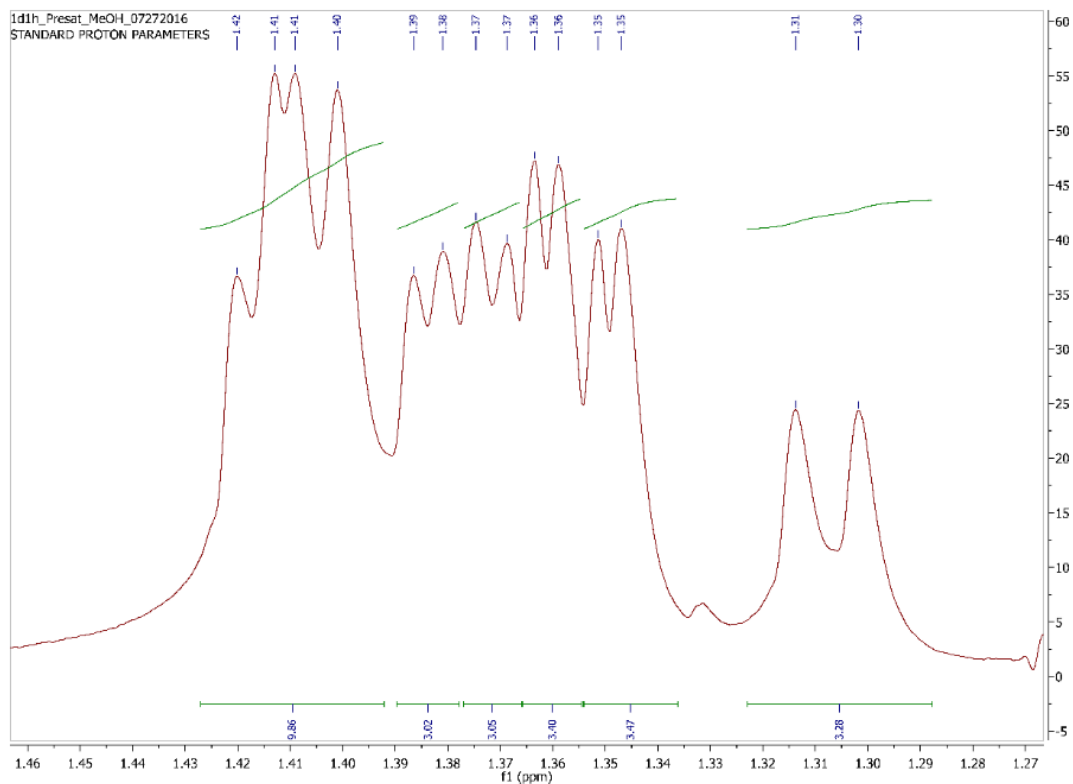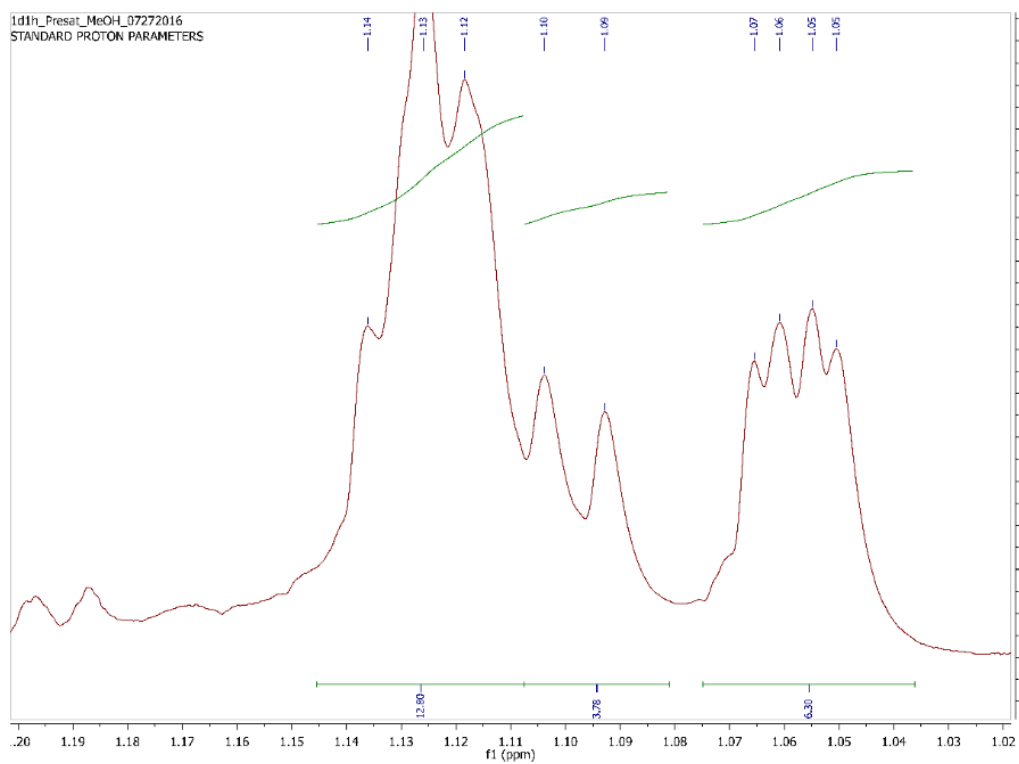

Supplementary Fig. S4. 1D NMR of oligomer **8**.  $^1\text{H}$  NMR spectra of **8** in  $\text{CD}_3\text{OH}$ .

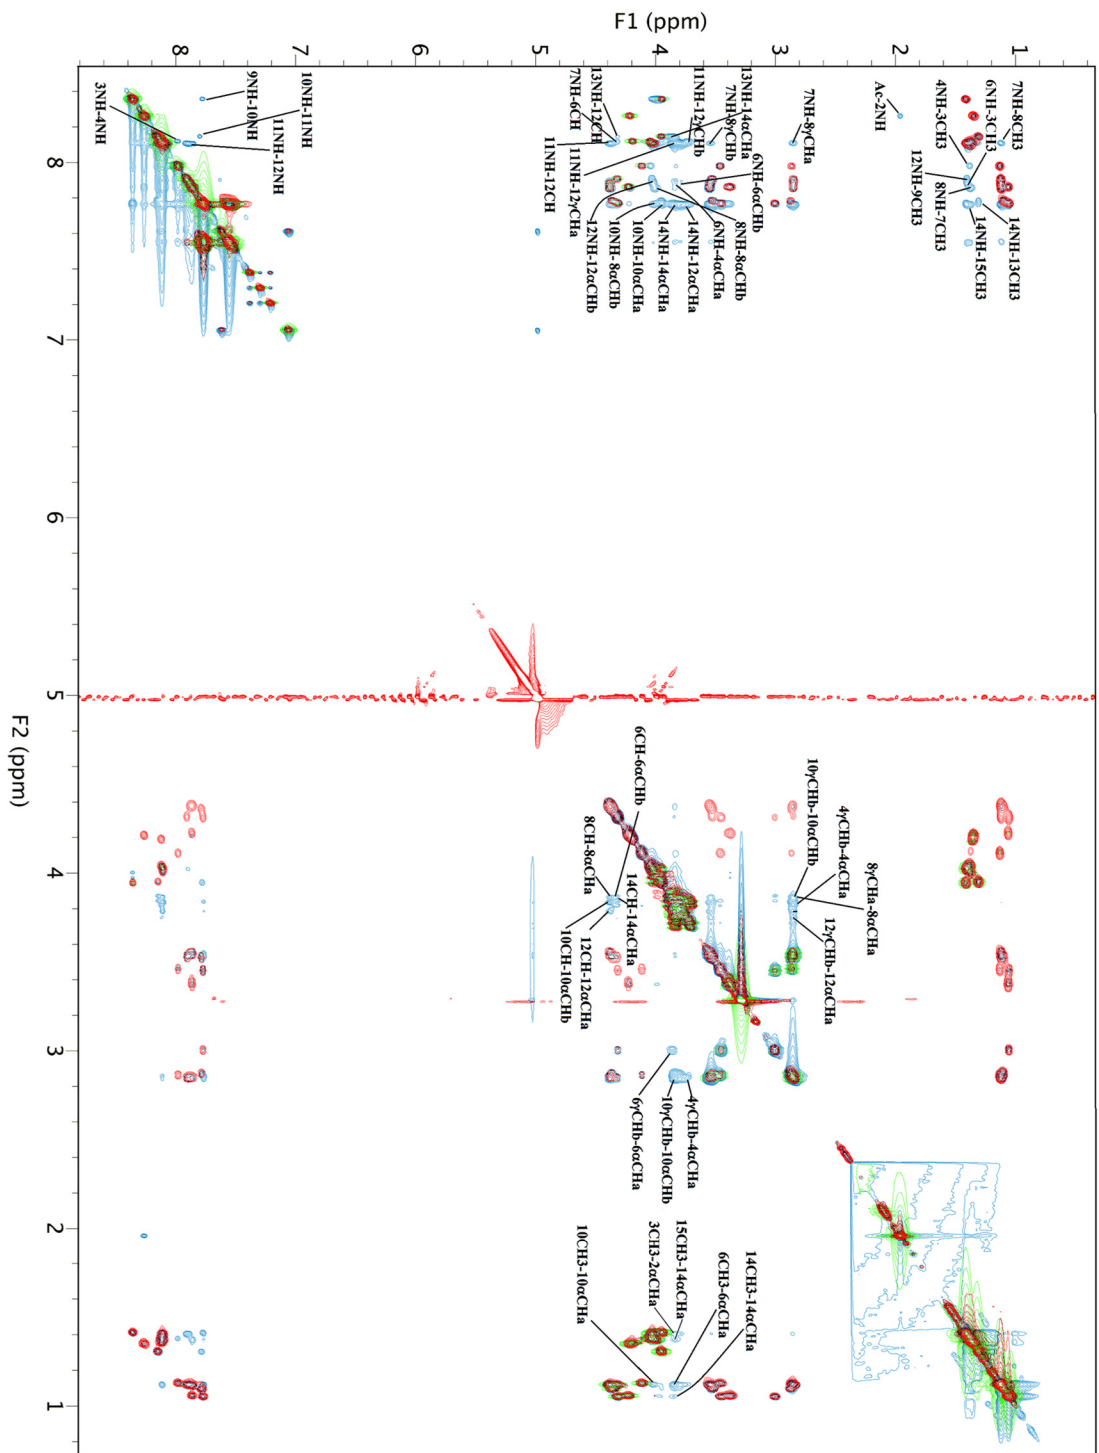



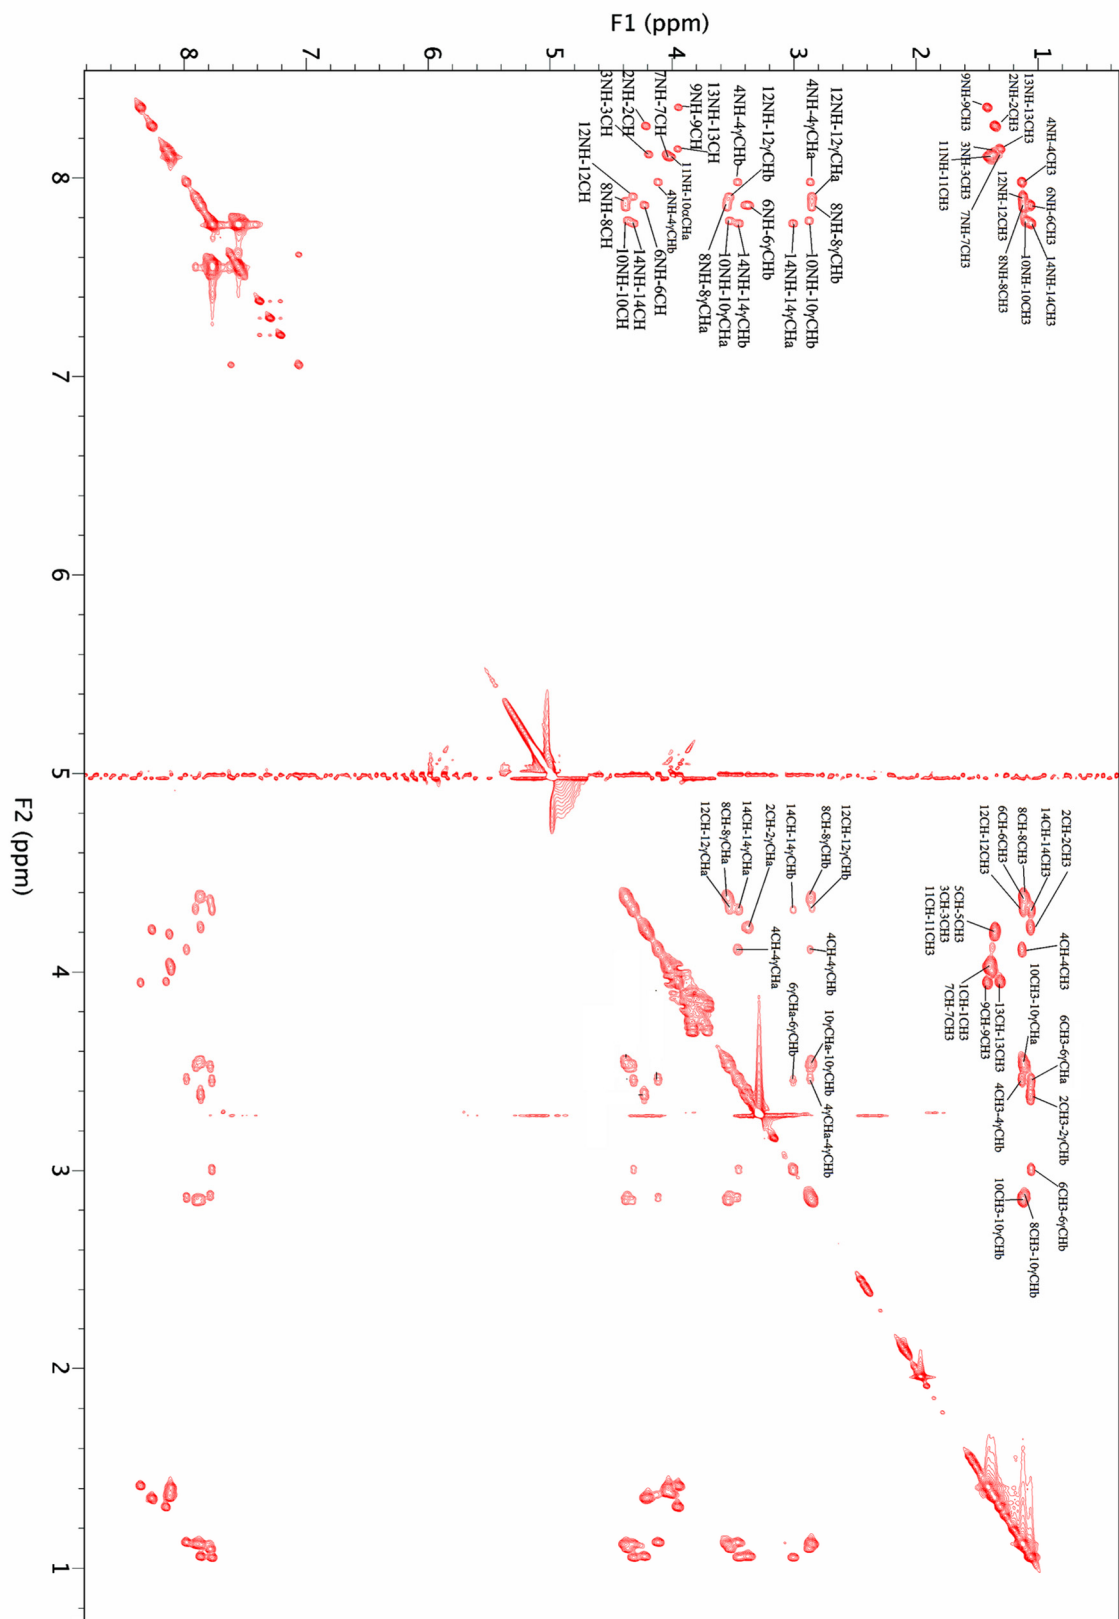

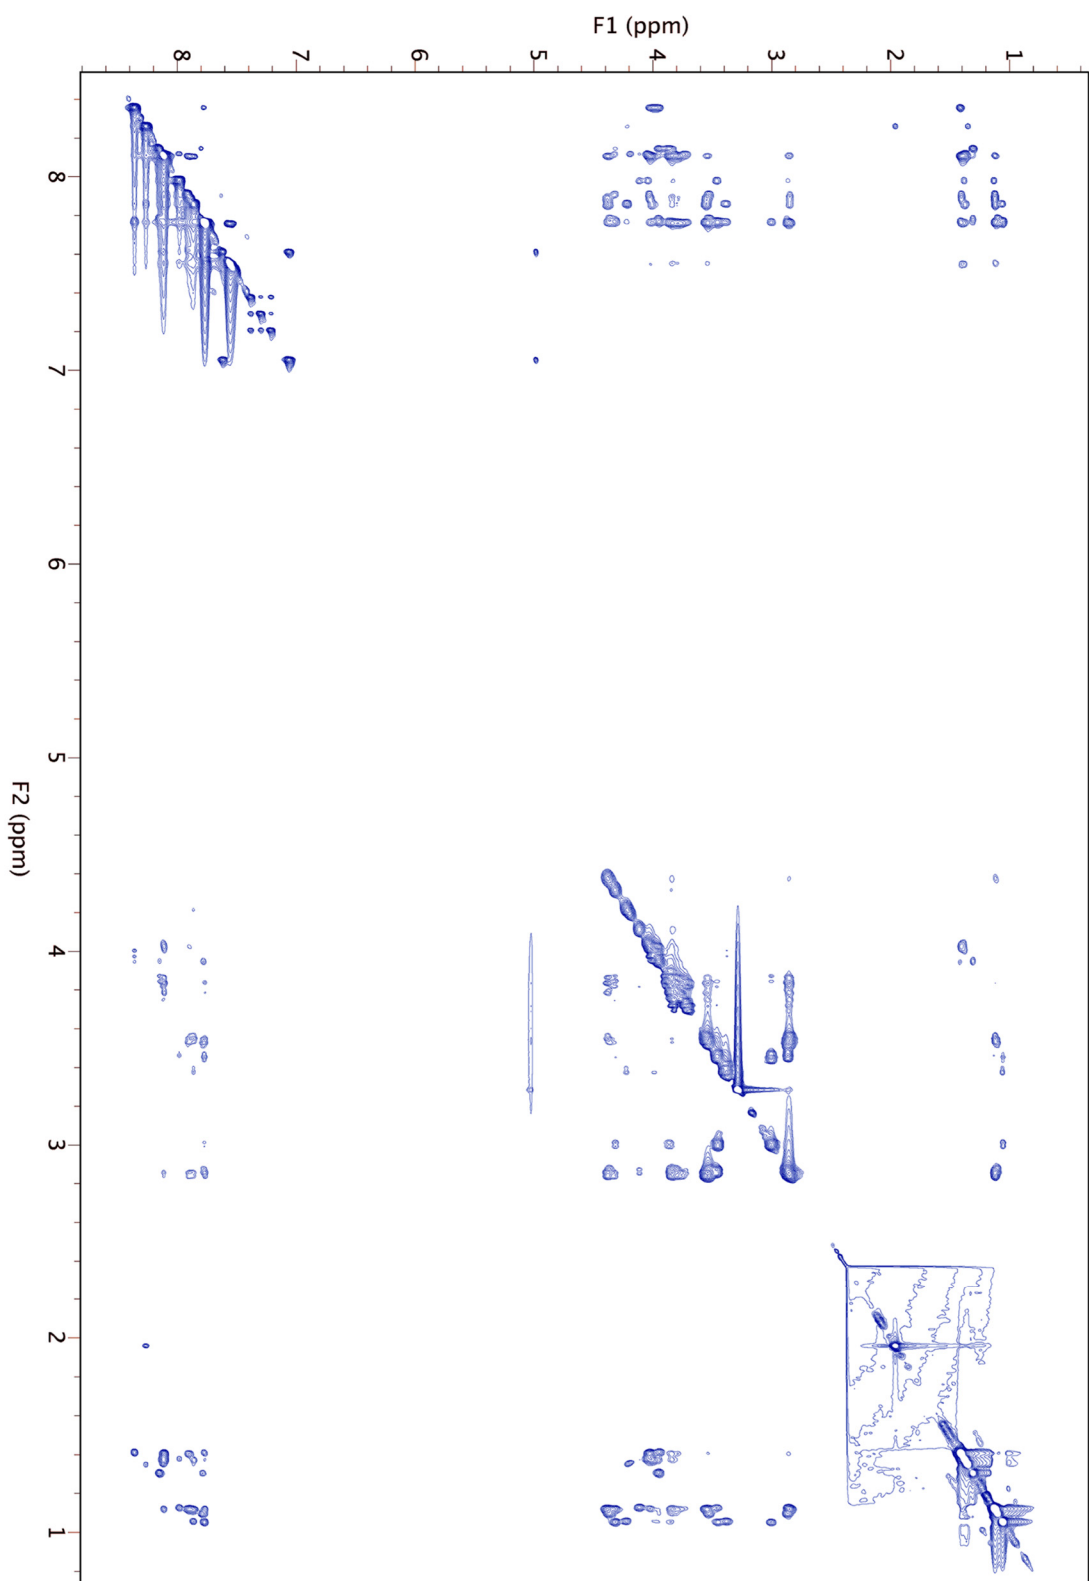

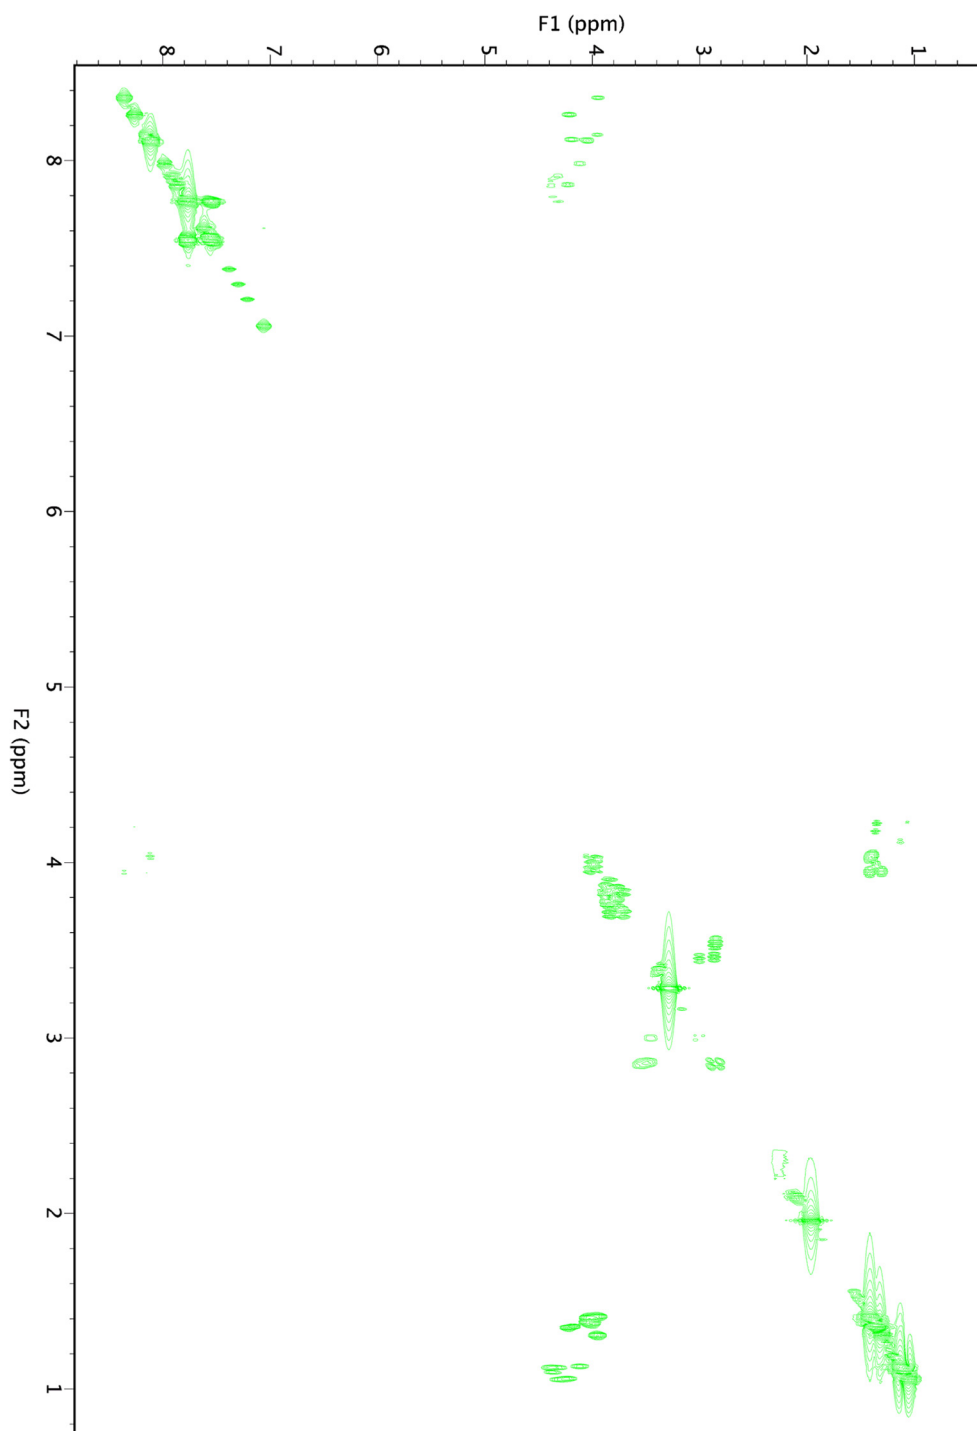

**Supplementary Fig. S5. Annotated natural 2D spectra for oligomer 8.** The spectra were collected at 600 MHz at a temperature of 10 °C. Chemical shift assignments were based on  $^1\text{H}$ ,  $^1\text{H}$ -zTOCSY (red color),  $^1\text{H}$ -NOESY (blue color), and  $^1\text{H}$ -COSY (green color).

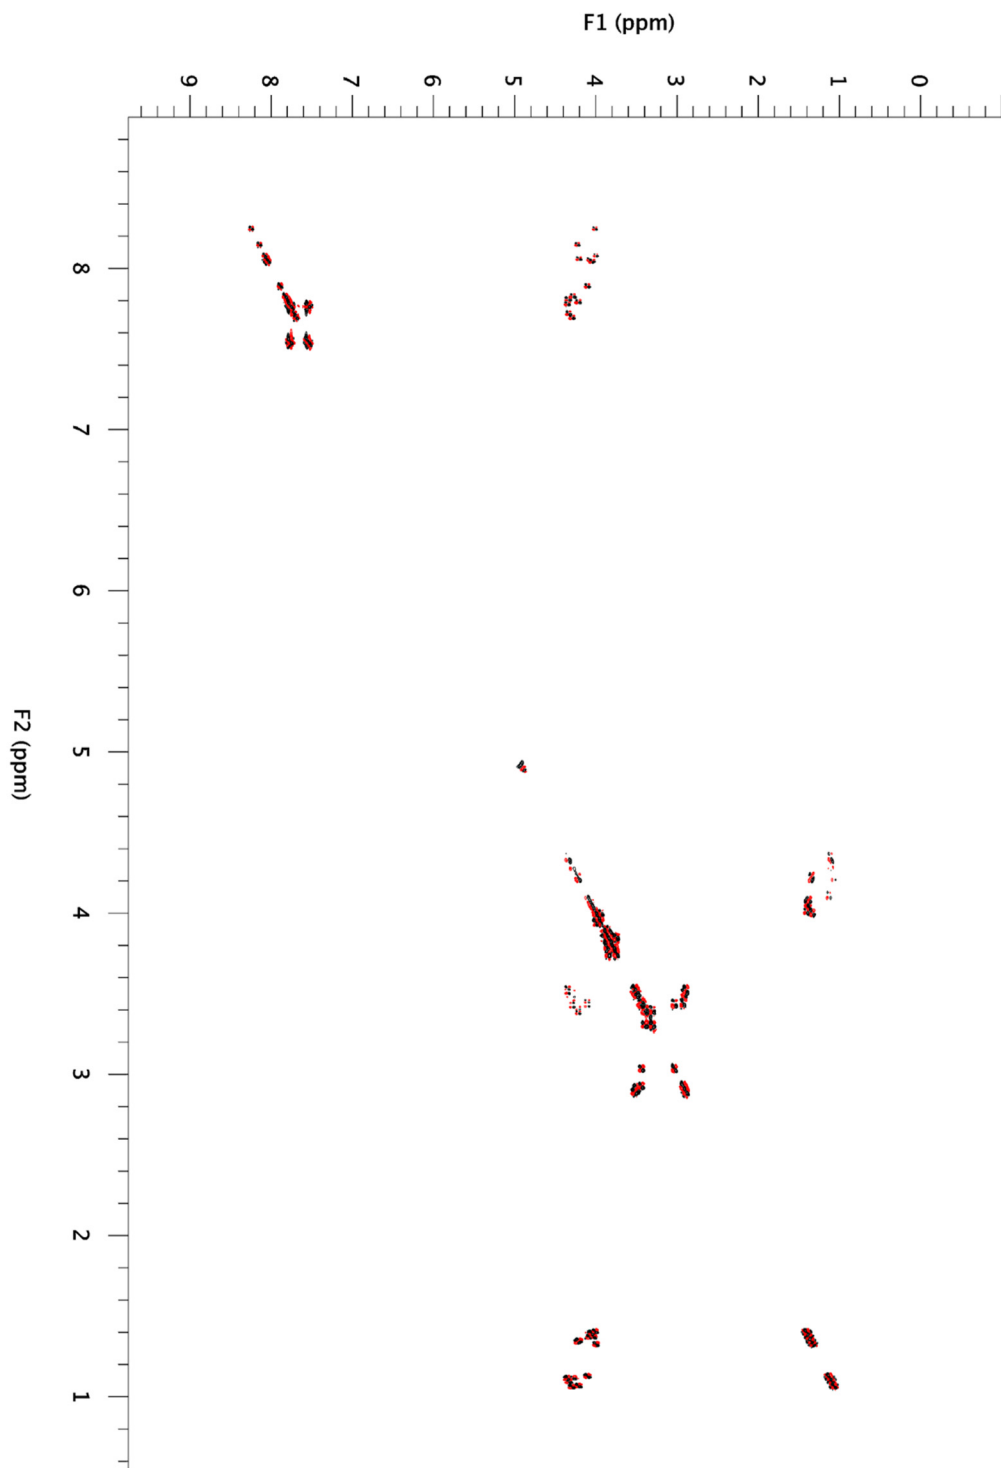

**Supplementary Fig. S6. DQFCOSY spectrum for oligomer 8.** The spectra were collected at 600 MHz at a temperature of 10 °C.

## 2. Supplementary Discussion

Lyophilized powders of oligomers **6** (3 mg), **9** (3 mg) and **10** (2 mg) were dissolved in 2 mL of dichloromethane/acetonitrile (20:80, v/v) and then left for slow evaporation at room temperature within two days to give crystals. Lyophilized powders of oligomer **4** (2 mg) were dissolved in THF (2 mL) and then pentane (1 mL) was diffused slowly into THF layer, crystals were formed in a week. Crystals of **7** were obtained from slow evaporation of 3 mg/mL solution in chloroform. Oligomer **2** was also crystallized from slow diffusion of pentane into THF in ten days, however, the crystals were not of good quality for X-ray diffraction (diffraction up to 5.00 Å of resolution only). Foldamers **8** and **9** in 1:1 ratio (4 mg, the racemate **11**) was crystallized from CH<sub>2</sub>Cl<sub>2</sub>/CH<sub>3</sub>CN (60:40, v/v) using slow vaporization over two days.

Both compounds **4** and **7** crystallize in *P2*<sub>1</sub> space group with one molecule in the asymmetric unit. While compounds **6** and **8** crystallize in *P4*<sub>1</sub>*2*<sub>1</sub>*2* space group with two α peptide and two sulfono-γ-AA peptide residues in the asymmetric unit. In contrast, compounds **9** and **10** crystallize in *P4*<sub>3</sub>*2*<sub>1</sub>*2* space group with two α peptide and two sulfono-γ-AA peptide residues in the asymmetric unit. The apparent infinite chain in structures **6**, **9**, and **10** is an effect of translational disorder in those structures and occupancy of atoms in model were adjusted to match the appropriate formulas, therefore the N-terminal acetyl group was not visible.

The X-ray diffraction data for all compounds were measured on Bruker D8 Venture PHOTON 100 CMOS system equipped with a Cu K<sub>α</sub> INCOATEC Imus micro-focus source (λ = 1.54178 Å). Indexing was performed using APEX3<sup>4</sup> (Difference Vectors method). Data integration and reduction were performed using SaintPlus 6.01<sup>5</sup>. Absorption correction was performed by multi-scan method implemented in SADABS<sup>6</sup>. Space groups were determined using XPREP implemented in APEX3. Structures were solved using SHELXT or SHELXD and refined using SHELXL-2014<sup>7-9</sup> (full-matrix least-squares on F<sup>2</sup>) through OLEX2 interface program<sup>10</sup>.

For compound **4**, diffraction spots were observed up to ca. 1.1 Å resolution. The structure has been solved using program Shelxd<sup>11</sup> and refined using geometry and ADP restraints. Inspection

of 2Fo-Fc electron density map in WinCoot<sup>12</sup> suggested the THF as disordered solvent. THF was subsequently modeled into the map, real space refined with WinCoot and finally refined with Shelxl with fixed occupancy and restraints. The group of electron density peaks located between aromatic rings of two helices have been tentatively assigned as pyridine and refined with restraints. Crystal data and refinement conditions are shown in Table S3.

**Supplementary Table S2:** Crystal data and structure refinement for Oligomer 4.

|                                             |                                                                                                                                         |
|---------------------------------------------|-----------------------------------------------------------------------------------------------------------------------------------------|
| Identification code                         | PT_G47_3_0422                                                                                                                           |
| Empirical formula                           | C <sub>102</sub> H <sub>149</sub> Cl <sub>5</sub> N <sub>18</sub> O <sub>27.5</sub> S <sub>5</sub>                                      |
| Empirical formula                           | C <sub>75</sub> H <sub>100</sub> Cl <sub>5</sub> N <sub>17</sub> O <sub>22</sub> S <sub>5</sub> ·5.5THF·C <sub>5</sub> H <sub>5</sub> N |
| Formula weight                              | 2404.93                                                                                                                                 |
| Temperature/K                               | 100(2)                                                                                                                                  |
| Crystal system                              | monoclinic                                                                                                                              |
| Space group                                 | P2 <sub>1</sub>                                                                                                                         |
| a/Å                                         | 12.5708(14)                                                                                                                             |
| b/Å                                         | 51.249(6)                                                                                                                               |
| c/Å                                         | 12.9887(14)                                                                                                                             |
| α/°                                         | 90                                                                                                                                      |
| β/°                                         | 90.116(2)                                                                                                                               |
| γ/°                                         | 90                                                                                                                                      |
| Volume/Å <sup>3</sup>                       | 8367.8(16)                                                                                                                              |
| Z                                           | 2                                                                                                                                       |
| ρ <sub>calc</sub> /cm <sup>3</sup>          | 0.954                                                                                                                                   |
| μ/mm <sup>-1</sup>                          | 1.835                                                                                                                                   |
| F(000)                                      | 2544.0                                                                                                                                  |
| Crystal size/mm <sup>3</sup>                | 0.400 × 0.090 × 0.080                                                                                                                   |
| Radiation                                   | CuKα (λ = 1.54178)                                                                                                                      |
| 2θ range for data collection/°              | 6.806 to 89.062                                                                                                                         |
| Index ranges                                | -11 ≤ h ≤ 11, -46 ≤ k ≤ 46, -11 ≤ l ≤ 11                                                                                                |
| Reflections collected                       | 55363                                                                                                                                   |
| Independent reflections                     | 12960 [R <sub>int</sub> = 0.0859, R <sub>sigma</sub> = 0.1006]                                                                          |
| Data/restraints/parameters                  | 12960/2258/1403                                                                                                                         |
| Goodness-of-fit on F <sup>2</sup>           | 1.254                                                                                                                                   |
| Final R indexes [I ≥ 2σ (I)]                | R <sub>1</sub> = 0.1308, wR <sub>2</sub> = 0.3169                                                                                       |
| Final R indexes [all data]                  | R <sub>1</sub> = 0.1839, wR <sub>2</sub> = 0.3451                                                                                       |
| Largest diff. peak/hole / e Å <sup>-3</sup> | 0.55/-0.49                                                                                                                              |
| Flack parameter                             | 0.124(8)                                                                                                                                |

For compound **6**, the structure solution has led to apparent “infinite” helix which can be explained through the presence of translational disorder between discrete chains in the crystal. The occupancy of each of two C3NSO2PhCl parts (of sulfono- $\gamma$ -AApeptide) has been adjusted to 0.857 in asymmetric unit to match the ratio of alanine to sulfono- $\gamma$ -AApeptide (7:6). From the disorder point of view when C3NSO2PhCl part is missing the terminal part of peptide is present leading to the column formed out of peptide helices interacting through hydrogen bonds. The disordered Ph-Cl groups and solvent (CH<sub>3</sub>CN) have been refined using restraints. Crystal data and refinement conditions are shown in Table S4.

**Supplementary Table S3:** Crystal data and structure refinement for oligomer **6**.

|                                        |                                                                                                                          |
|----------------------------------------|--------------------------------------------------------------------------------------------------------------------------|
| Identification code                    | pt_g_36_2_0m                                                                                                             |
| Empirical formula                      | C <sub>106.5</sub> H <sub>144.25</sub> Cl <sub>6</sub> N <sub>28.75</sub> O <sub>26</sub> S <sub>6</sub>                 |
| Moiety Formula                         | C <sub>89</sub> H <sub>118</sub> Cl <sub>6</sub> N <sub>20</sub> O <sub>26</sub> S <sub>6</sub> , 8.75CH <sub>3</sub> CN |
| Formula weight                         | 2648.18                                                                                                                  |
| Temperature/K                          | 100                                                                                                                      |
| Crystal system                         | tetragonal                                                                                                               |
| Space group                            | P4 <sub>1</sub> 2 <sub>1</sub> 2                                                                                         |
| a/Å                                    | 17.1537(4)                                                                                                               |
| b/Å                                    | 17.1537(4)                                                                                                               |
| c/Å                                    | 28.9825(8)                                                                                                               |
| $\alpha$ /°                            | 90                                                                                                                       |
| $\beta$ /°                             | 90                                                                                                                       |
| $\gamma$ /°                            | 90                                                                                                                       |
| Volume/Å <sup>3</sup>                  | 8528.1(5)                                                                                                                |
| Z                                      | 2.28571                                                                                                                  |
| $\rho_{\text{calc}}$ /cm <sup>3</sup>  | 1.179                                                                                                                    |
| $\mu$ /mm <sup>-1</sup>                | 2.406                                                                                                                    |
| F(000)                                 | 3178.0                                                                                                                   |
| Crystal size/mm <sup>3</sup>           | 0.140 × 0.140 × 0.120                                                                                                    |
| Radiation                              | CuK $\alpha$ ( $\lambda$ = 1.54178)                                                                                      |
| 2 $\theta$ range for data collection/° | 7.288 to 138.224                                                                                                         |
| Index ranges                           | -20 ≤ h ≤ 20, -20 ≤ k ≤ 20, -34 ≤ l ≤ 32                                                                                 |
| Reflections collected                  | 64938                                                                                                                    |
| Independent reflections                | 7920 [R <sub>int</sub> = 0.0514, R <sub>sigma</sub> = 0.0337]                                                            |
| Data/restraints/parameters             | 7920/244/503                                                                                                             |

|                                                |                                  |
|------------------------------------------------|----------------------------------|
| Goodness-of-fit on $F^2$                       | 1.057                            |
| Final R indexes [ $I \geq 2\sigma(I)$ ]        | $R_1 = 0.0985$ , $wR_2 = 0.2669$ |
| Final R indexes [all data]                     | $R_1 = 0.1304$ , $wR_2 = 0.3149$ |
| Largest diff. peak/hole / $e \text{ \AA}^{-3}$ | 0.55/-0.40                       |
| Flack parameter                                | 0.041(10)                        |

For compound **7**, Diffraction spots were observed only up to ca. 1.2 – 1.30 Å resolution. The structure has been solved using program Shelxd<sup>11</sup> using NSO<sub>2</sub> fragment seeding and completed using Fourier methods in Shelxl. Due to low resolution and disorder, restraints were necessary to refine positions and anisotropic thermal parameters. Crystal was refined as pseudo-merohedral four component twin with 0 1 0 -1 0 0 0 1 4 twin law. After each refinement run the 2Fo-Fc map has been inspected using Program WinCoot, especially for significantly disordered terminal residues, to assure that atoms are located within the map contours (at 0.6–1 sigma level). Distances of O...N hydrogen bonds were restrained at terminal sides to prevent drifting of disordered residues. Disordered chloroform and tentative MeCN/MeOH molecules were refined using restraints. The inspection of 2Fo-Fc electron density map in WinCoot had clearly suggested the CHCl<sub>3</sub> as disordered solvent. CHCl<sub>3</sub> was subsequently modeled into the map, real space refined with WinCoot and finally refined with Shelxl with fixed occupancy and restraints. Some of the larger residual electron density peaks have been tentatively assigned as Cl with assumption they are a part of heavily disordered chloroform molecules that could not be easily localized. The relatively high R-factor is caused mostly by unaccounted disordered solvent molecules – it can be lowered to ~11% through application of Squeeze solvent mask procedure. This however eliminates chloroform molecules which are important part of crystal packing so solvent corrected data have not been presented for publication. Although the data quality is low per small molecule crystallography standards the main goal of structural analysis was to establish secondary structure, for which purpose the data quality is sufficient in authors' opinion. The relatively high R-factor is caused mostly by unaccounted disordered solvent molecules, which can be lowered to ~ 10% through



application of Squeeze procedure. This however eliminates solvent molecules which are important part of crystal packing. Two models of crystal structure are provided: 1) including solvent (Table S4) and 2) with solvent mask where disordered solvent molecules and counterions were treated as diffuse using Platon Squeeze procedure (Table S5).<sup>13</sup>

**Supplementary Table S4:** Crystal data and structure refinement for oligomer 7\_solvent.

|                                             |                                                                                                                                                              |
|---------------------------------------------|--------------------------------------------------------------------------------------------------------------------------------------------------------------|
| Identification code                         | TP48_2_0m                                                                                                                                                    |
| Empirical formula                           | C <sub>114.82</sub> H <sub>136.32</sub> Cl <sub>22.95</sub> N <sub>25</sub> O <sub>33.5</sub> S <sub>7</sub>                                                 |
| Moiety formula                              | C <sub>100</sub> H <sub>131</sub> Cl <sub>7</sub> N <sub>22</sub> O <sub>29</sub> S <sub>7</sub> , 5.32(CHCl <sub>3</sub> ), 3(C <sub>2</sub> N), 3.5(CO), O |
| Formula weight                              | 3440.57                                                                                                                                                      |
| Temperature/K                               | 100.04                                                                                                                                                       |
| Crystal system                              | monoclinic                                                                                                                                                   |
| Space group                                 | P2 <sub>1</sub>                                                                                                                                              |
| a/Å                                         | 17.1947(15)                                                                                                                                                  |
| b/Å                                         | 17.2126(16)                                                                                                                                                  |
| c/Å                                         | 35.063(3)                                                                                                                                                    |
| α/°                                         | 90                                                                                                                                                           |
| β/°                                         | 90.043(4)                                                                                                                                                    |
| γ/°                                         | 90                                                                                                                                                           |
| Volume/Å <sup>3</sup>                       | 10377.5(16)                                                                                                                                                  |
| Z                                           | 2                                                                                                                                                            |
| ρ <sub>calc</sub> /cm <sup>3</sup>          | 1.101                                                                                                                                                        |
| μ/mm <sup>-1</sup>                          | 3.911                                                                                                                                                        |
| F(000)                                      | 3541.0                                                                                                                                                       |
| Crystal size/mm <sup>3</sup>                | 0.120 × 0.100 × 0.060                                                                                                                                        |
| Radiation                                   | CuKα (λ = 1.54178)                                                                                                                                           |
| 2θ range for data collection/°              | 5.134 to 74.162                                                                                                                                              |
| Index ranges                                | -13 ≤ h ≤ 13, -13 ≤ k ≤ 13, -26 ≤ l ≤ 26                                                                                                                     |
| Reflections collected                       | 23651                                                                                                                                                        |
| Independent reflections                     | 9355 [R <sub>int</sub> = 0.0691, R <sub>sigma</sub> = 0.0822]                                                                                                |
| Data/restraints/parameters                  | 9355/3223/1853                                                                                                                                               |
| Goodness-of-fit on F <sup>2</sup>           | 1.535                                                                                                                                                        |
| Final R indexes [I ≥ 2σ (I)]                | R <sub>1</sub> = 0.1557, wR <sub>2</sub> = 0.3341                                                                                                            |
| Final R indexes [all data]                  | R <sub>1</sub> = 0.1955, wR <sub>2</sub> = 0.3845                                                                                                            |
| Largest diff. peak/hole / e Å <sup>-3</sup> | 0.56/-0.43                                                                                                                                                   |
| Flack parameter                             | 0.012(16)                                                                                                                                                    |

**Table S5** Crystal data and structure refinement for oligomer **7\_solvent\_mask**.

|                                             |                                                                                                  |
|---------------------------------------------|--------------------------------------------------------------------------------------------------|
| Identification code                         | Oligomer <b>7_solvent_mask</b>                                                                   |
| Empirical formula                           | C <sub>100</sub> H <sub>131</sub> Cl <sub>7</sub> N <sub>22</sub> O <sub>29</sub> S <sub>7</sub> |
| Formula weight                              | 2577.83                                                                                          |
| Temperature/K                               | 100.04                                                                                           |
| Crystal system                              | monoclinic                                                                                       |
| Space group                                 | P2 <sub>1</sub>                                                                                  |
| a/Å                                         | 17.1947(15)                                                                                      |
| b/Å                                         | 17.2126(16)                                                                                      |
| c/Å                                         | 35.063(3)                                                                                        |
| α/°                                         | 90                                                                                               |
| β/°                                         | 90.043(4)                                                                                        |
| γ/°                                         | 90                                                                                               |
| Volume/Å <sup>3</sup>                       | 10377.5(16)                                                                                      |
| Z                                           | 2                                                                                                |
| ρ <sub>calc</sub> /cm <sup>3</sup>          | 0.825                                                                                            |
| μ/mm <sup>-1</sup>                          | 1.930                                                                                            |
| F(000)                                      | 2696.0                                                                                           |
| Crystal size/mm <sup>3</sup>                | 0.12 × 0.1 × 0.06                                                                                |
| Radiation                                   | CuKα (λ = 1.54178)                                                                               |
| 2θ range for data collection/°              | 5.14 to 71.462                                                                                   |
| Index ranges                                | -13 ≤ h ≤ 13, -13 ≤ k ≤ 13, -26 ≤ l ≤ 26                                                         |
| Reflections collected                       | 9342                                                                                             |
| Independent reflections                     | 9342 [R <sub>int</sub> = 0.0691, R <sub>sigma</sub> = 0.0819]                                    |
| Data/restraints/parameters                  | 9342/2807/1486                                                                                   |
| Goodness-of-fit on F <sup>2</sup>           | 1.063                                                                                            |
| Final R indexes [I ≥ 2σ (I)]                | R <sub>1</sub> = 0.0973, wR <sub>2</sub> = 0.2443                                                |
| Final R indexes [all data]                  | R <sub>1</sub> = 0.1329, wR <sub>2</sub> = 0.2972                                                |
| Largest diff. peak/hole / e Å <sup>-3</sup> | 0.45/-0.31                                                                                       |
| Flack parameter                             | 0.29(3)                                                                                          |

Oligomers **9**, **10**, and **11** diffracted up to 0.95 Å resolution. Disordered parts were refined using restraints. Data processing and structure solution of all structures have initially led to apparent “infinite” polymeric” helix and structure with unit cell parameters along the axis of helix shorter than the length of actual helix. This could be explained as an effect of translational disorder between

discrete peptide chains in the crystal as already discussed in previous publication.<sup>1</sup> The possible explanation is that discrete peptide chains interact through hydrogen bonds at terminal points to form a “column”. Adjacent “Columns” (helices) are interacting weakly. Because seven (or eight)  $\gamma$ -peptide residues are present in single helix, several packing modes are possible, with adjacent helices translated or translated and rotated so that the same weak stabilizing interactions are still present. This leads to translational disorder and diffraction pattern resembling the one from hypothetical structure with “infinite-like” polymeric peptide chains. In reality, the C3NSO2Ph part of the apparent infinite chain is missing at sites where every 8th (or 9th)  $\gamma$ -peptide residue would reside in hypothetical infinite helix. The gap is where hydrogen bond interactions between terminal parts of polypeptides take place. This is accounted for in the model by lower than one occupancy of corresponding part of  $\gamma$ -peptide. The contribution of disordered content in structural voids was treated as diffuse using Squeeze procedure implemented in Platon program.<sup>14,15</sup> Crystal data and refinement conditions are shown in Tables S6-S8.

**Supplementary Table S6.** Crystal data and structure refinement for oligomer **9**.

|                                  |                                                                                                  |
|----------------------------------|--------------------------------------------------------------------------------------------------|
| Identification code              | JC_TP_H_108_1                                                                                    |
| Empirical formula                | C <sub>103</sub> H <sub>136</sub> Cl <sub>7</sub> N <sub>23</sub> O <sub>30</sub> S <sub>7</sub> |
| Formula weight                   | 2648.91                                                                                          |
| Temperature/K                    | 99.99                                                                                            |
| Crystal system                   | tetragonal                                                                                       |
| Space group                      | P4 <sub>3</sub> 2 <sub>1</sub> 2                                                                 |
| a/Å                              | 17.1371(4)                                                                                       |
| b/Å                              | 17.1371(4)                                                                                       |
| c/Å                              | 29.0104(8)                                                                                       |
| $\alpha$ /°                      | 90                                                                                               |
| $\beta$ /°                       | 90                                                                                               |
| $\gamma$ /°                      | 90                                                                                               |
| Volume/Å <sup>3</sup>            | 8519.8(5)                                                                                        |
| Z                                | 2                                                                                                |
| $\rho_{\text{calc}}/\text{cm}^3$ | 1.033                                                                                            |
| $\mu/\text{mm}^{-1}$             | 2.369                                                                                            |
| F(000)                           | 2772.0                                                                                           |

|                                             |                                                               |
|---------------------------------------------|---------------------------------------------------------------|
| Crystal size/mm <sup>3</sup>                | 0.33 × 0.15 × 0.13                                            |
| Radiation                                   | CuKα (λ = 1.54178)                                            |
| 2Θ range for data collection/°              | 7.294 to 149.614                                              |
| Index ranges                                | -20 ≤ h ≤ 21, -19 ≤ k ≤ 16, -34 ≤ l ≤ 36                      |
| Reflections collected                       | 74789                                                         |
| Independent reflections                     | 8717 [R <sub>int</sub> = 0.0492, R <sub>sigma</sub> = 0.0328] |
| Data/restraints/parameters                  | 8717/96/419                                                   |
| Goodness-of-fit on F <sup>2</sup>           | 1.069                                                         |
| Final R indexes [I ≥ 2σ (I)]                | R <sub>1</sub> = 0.0661, wR <sub>2</sub> = 0.2052             |
| Final R indexes [all data]                  | R <sub>1</sub> = 0.0755, wR <sub>2</sub> = 0.2183             |
| Largest diff. peak/hole / e Å <sup>-3</sup> | 0.32/-0.29                                                    |
| Flack parameter                             | 0.143(8)                                                      |

**Supplementary Table S7.** Crystal data and structure refinement for oligomer **10**.

|                                    |                                                                                                  |
|------------------------------------|--------------------------------------------------------------------------------------------------|
| Identification code                | TP_H_108_3                                                                                       |
| Empirical formula                  | C <sub>117</sub> H <sub>154</sub> Cl <sub>8</sub> N <sub>26</sub> O <sub>34</sub> S <sub>8</sub> |
| Formula weight                     | 3008.62                                                                                          |
| Temperature/K                      | 99.98                                                                                            |
| Crystal system                     | tetragonal                                                                                       |
| Space group                        | P4 <sub>3</sub> 2 <sub>1</sub> 2                                                                 |
| a/Å                                | 17.1367(3)                                                                                       |
| b/Å                                | 17.1367(3)                                                                                       |
| c/Å                                | 28.9848(11)                                                                                      |
| α/°                                | 90                                                                                               |
| β/°                                | 90                                                                                               |
| γ/°                                | 90                                                                                               |
| Volume/Å <sup>3</sup>              | 8511.9(4)                                                                                        |
| Z                                  | 1.77776                                                                                          |
| ρ <sub>calc</sub> /cm <sup>3</sup> | 1.043                                                                                            |
| μ/mm <sup>-1</sup>                 | 2.404                                                                                            |
| F(000)                             | 2798.0                                                                                           |
| Crystal size/mm <sup>3</sup>       | 0.37 × 0.11 × 0.09                                                                               |
| Radiation                          | CuKα (λ = 1.54178)                                                                               |
| 2Θ range for data collection/°     | 5.992 to 108.528                                                                                 |
| Index ranges                       | -18 ≤ h ≤ 18, -18 ≤ k ≤ 18, -28 ≤ l ≤ 30                                                         |
| Reflections collected              | 69116                                                                                            |
| Independent reflections            | 5205 [R <sub>int</sub> = 0.1112, R <sub>sigma</sub> = 0.0373]                                    |
| Data/restraints/parameters         | 5205/204/419                                                                                     |

|                                                |                                  |
|------------------------------------------------|----------------------------------|
| Goodness-of-fit on $F^2$                       | 1.044                            |
| Final R indexes [ $I \geq 2\sigma(I)$ ]        | $R_1 = 0.0645$ , $wR_2 = 0.1718$ |
| Final R indexes [all data]                     | $R_1 = 0.1012$ , $wR_2 = 0.2002$ |
| Largest diff. peak/hole / $e \text{ \AA}^{-3}$ | 0.17/-0.19                       |
| Flack parameter                                | 0.045(11)                        |

**Supplementary Table S8.** Crystal data and structure refinement for oligomer **11**.

|                                                |                                                                    |
|------------------------------------------------|--------------------------------------------------------------------|
| Identification code                            | TP_7_MIX                                                           |
| Empirical formula                              | $C_{103}H_{136}Cl_7N_{23}O_{30}S_7$                                |
| Formula weight                                 | 2648.91                                                            |
| Temperature/K                                  | 150.0                                                              |
| Crystal system                                 | tetragonal                                                         |
| Space group                                    | $I4_1/a$                                                           |
| $a/\text{\AA}$                                 | 21.1606(12)                                                        |
| $b/\text{\AA}$                                 | 21.1606(12)                                                        |
| $c/\text{\AA}$                                 | 17.5048(11)                                                        |
| $\alpha/^\circ$                                | 90                                                                 |
| $\beta/^\circ$                                 | 90                                                                 |
| $\gamma/^\circ$                                | 90                                                                 |
| Volume/ $\text{\AA}^3$                         | 7838.1(10)                                                         |
| Z                                              | 2                                                                  |
| $\rho_{\text{calc}}/\text{cm}^3$               | 1.122                                                              |
| $\mu/\text{mm}^{-1}$                           | 2.575                                                              |
| F(000)                                         | 2772.0                                                             |
| Crystal size/ $\text{mm}^3$                    | $0.3 \times 0.28 \times 0.25$                                      |
| Radiation                                      | $\text{CuK}\alpha$ ( $\lambda = 1.54178$ )                         |
| $2\Theta$ range for data collection/ $^\circ$  | 6.552 to 109.012                                                   |
| Index ranges                                   | $-22 \leq h \leq 20$ , $-20 \leq k \leq 19$ , $-18 \leq l \leq 18$ |
| Reflections collected                          | 19991                                                              |
| Independent reflections                        | 2411 [ $R_{\text{int}} = 0.0670$ , $R_{\text{sigma}} = 0.0432$ ]   |
| Data/restraints/parameters                     | 2411/102/210                                                       |
| Goodness-of-fit on $F^2$                       | 1.119                                                              |
| Final R indexes [ $I \geq 2\sigma(I)$ ]        | $R_1 = 0.0891$ , $wR_2 = 0.2974$                                   |
| Final R indexes [all data]                     | $R_1 = 0.1074$ , $wR_2 = 0.3173$                                   |
| Largest diff. peak/hole / $e \text{ \AA}^{-3}$ | 0.26/-0.29                                                         |

**Supplementary Table S9.** Crystal pictures of oligomers **2**, **4**, **6**, **7**, **9**, **10**, and **11**.

| Number            | Crystal pictures                                                                                                                                                                                                                                                                |
|-------------------|---------------------------------------------------------------------------------------------------------------------------------------------------------------------------------------------------------------------------------------------------------------------------------|
| Oligomer <b>2</b> | 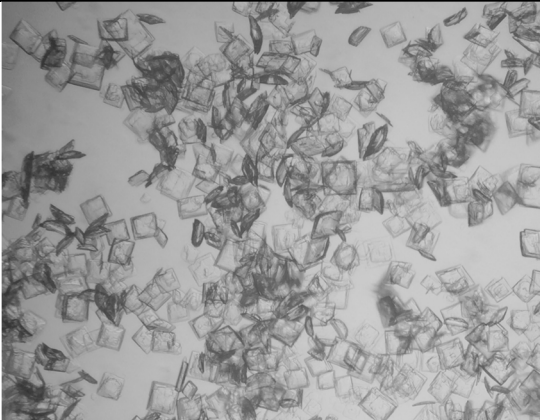 A micrograph showing a dense field of small, dark, irregularly shaped crystals. The crystals appear to be thin plates or needles, scattered across the field of view.                        |
| Oligomer <b>4</b> |  A micrograph showing several large, dark, angular crystals. The crystals are highly reflective, showing bright, multi-colored diffraction patterns (iridescence) against a dark background. |
| Oligomer <b>6</b> |  A micrograph showing a few large, dark, angular crystals. The crystals are highly reflective, showing bright, multi-colored diffraction patterns (iridescence) against a light background. |

|                    |  |                                                                                                                                                                                                                                                                                               |  |
|--------------------|--|-----------------------------------------------------------------------------------------------------------------------------------------------------------------------------------------------------------------------------------------------------------------------------------------------|--|
| <p>Oligomer 7</p>  |  | 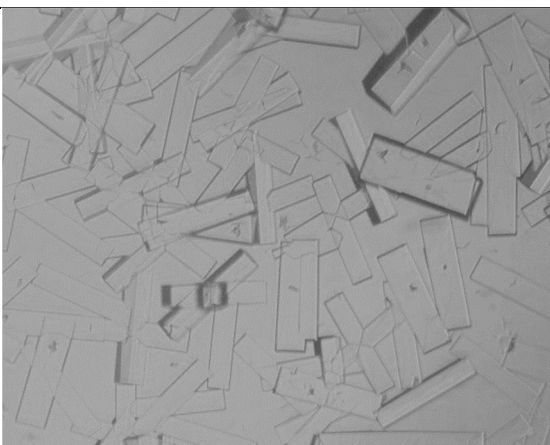 Micrograph showing numerous small, rectangular, plate-like crystals of Oligomer 7. The crystals are densely packed and appear as thin, flat, light-colored sheets against a darker background.             |  |
| <p>Oligomer 9</p>  |  |  Micrograph showing large, elongated, needle-like crystals of Oligomer 9. The crystals are thin and have a distinct layered or fibrous structure, with some smaller, irregular fragments scattered around. |  |
| <p>Oligomer 10</p> |  |  Micrograph showing large, star-shaped or multi-lobed crystals of Oligomer 10. The crystals are thin and have a complex, branching morphology. A scale bar in the bottom right corner indicates 500 μm.   |  |

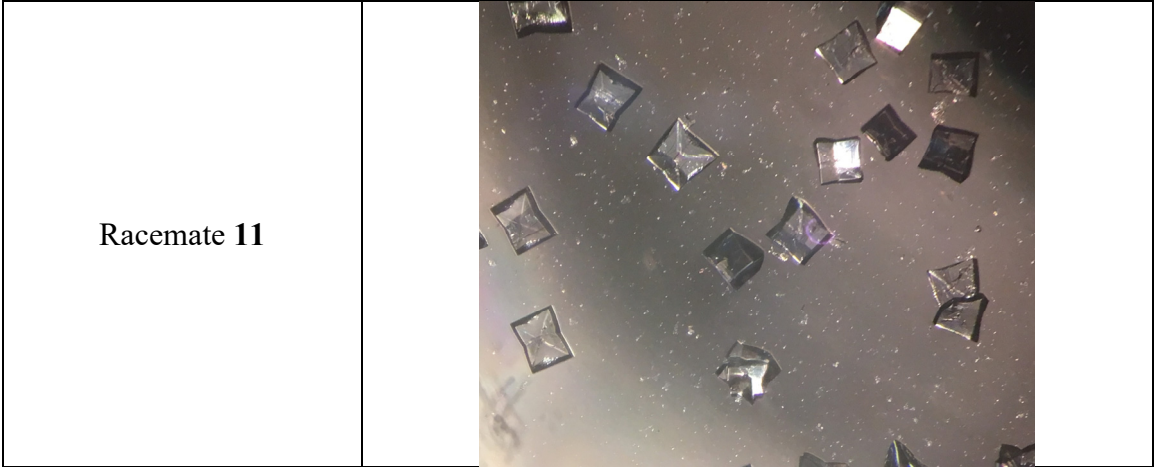



### 3. Supplementary References

- 1 Teng, P. *et al.* Hydrogen-Bonding-Driven 3D Supramolecular Assembly of Peptidomimetic Zipper. *J. Am. Chem. Soc.* **140**, 5661–5665 (2018).
- 2 Teng, P. *et al.* Right-Handed Helical Foldamers Consisting of De Novo d-AApeptides. *J. Am. Chem. Soc.* **139**, 7363–7369 (2017).
- 3 Wu, H. *et al.* New Class of Heterogeneous Helical Peptidomimetics. *Org. Lett.* **17**, 3524–3527 (2015).
- 4 Bruker (2016). APEX3 (Version 2015.9). Bruker AXS Inc., Madison, Wisconsin, USA.
- 5 Bruker (2016) SAINT V8.35A. Data Reduction Software.
- 6 Sheldrick, G. M. (1996). SADABS. Program for Empirical Absorption Correction. University of Gottingen, Germany.
- 7 Sheldrick, G.M. (1997) SHELXL-97. Program for the Refinement of Crystal.
- 8 Sheldrick, G. Phase annealing in SHELX-90: direct methods for larger structures. *Acta Cryst. A* **46**, 467–473 (1990).
- 9 Sheldrick, G. A short history of SHELX. *Acta Cryst. A* **64**, 112–122 (2008).
- 10 Dolomanov, O. V., Bourhis, L. J., Gildea, R. J., Howard, J. A. K. & Puschmann, H. OLEX2: a complete structure solution, refinement and analysis program. *J. Appl. Crystallogr.* **42**, 339–341 (2009).
- 11 Sheldrick, G. Experimental phasing with SHELXC/D/E: combining chain tracing with density modification. *Acta Cryst. D* **66**, 479–485 (2010).
- 12 Emsley, P., Lohkamp, B., Scott, W. G. & Cowtan, K. Features and development of Coot. *Acta Cryst. D* **66**, 486–501 (2010).
- 13 Spek, A. PLATON SQUEEZE: a tool for the calculation of the disordered solvent contribution to the calculated structure factors. *Acta Cryst. C* **71**, 9–18 (2015).
- 14 Spek, A. Structure validation in chemical crystallography. *Acta Cryst. D* **65**, 148–155 (2009).
- 15 Hooft, R. W. W., Straver, L. H. & Spek, A. L. Determination of absolute structure using Bayesian statistics on Bijvoet differences. *J. Appl. Crystallogr.* **41**, 96–103 (2008).
