# Supplementary material for: The folding propensity of α/sulfono-γ-AA peptidic foldamers with both left- and right-handedness
Source: PubMed Central journal article supplement (PMC9814141; doi:10.1038/s42004-021-00496-0), 2021-05-10
Supplement: 42004_2021_496_MOESM2_ESM.pdf [file 42004_2021_496_MOESM2_ESM.pdf]

## Description of Additional Supplementary Files

**File Name:** Supplementary Data 1

**Description:** CIF file for oligomer 4.

**File Name:** Supplementary Data 2

**Description:** CIF file for oligomer 6.

**File Name:** Supplementary Data 3

**Description:** CIF file for oligomer 7.

**File Name:** Supplementary Data 4

**Description:** CIF file for oligomer 7 where the solvents are masked.

**File Name:** Supplementary Data 5

**Description:** CIF file for oligomer 9.

**File Name:** Supplementary Data 6

**Description:** CIF file for oligomer 10.

**File Name:** Supplementary Data 7

**Description:** CIF file for oligomer 11.
